# Supplementary material for: Solanum hydroides (Solanaceae): a prickly novelty from the land of the sugar loaves, central Brazilian Atlantic Forest
Source: PhytoKeys. 2020 Feb 3;139:63–76. doi: 10.3897/phytokeys.139.46635 (PMC7010835; doi:10.3897/phytokeys.139.46635)
Supplement: Supplementary material 2 [file phytokeys-139-063-s002.xls]

## Sheet: Sheet1
institutioncode	collectioncode	catalognumber	scientificname	basisofrecord	kingdom	phylum	class	ordem	family	genus	species	subspecies	scientificnameauthor	identifiedby	yearidentified	monthidentified	dayidentified	typestatus	collectornumber	fieldnumber	collector	yearcollected	monthcollected	daycollected	julianday	timeofday	continentocean	country	stateprovince	county	locality	longitude	latitude	longitude_mun	latitude_mun	coordinateprecision	boundingbox	minimumelevation	maximumelevation	minimumdepth	maximumdepth	sex	preparationtype	individualcount	previouscatalognumber	relationshiptype	relatedcatalogitem	notes	barcode
BS	M	M-0171847	Solanum hexandrum	S	Plantae	Magnoliophyta	Magnoliopsida	Solanales	Solanaceae	Solanum	hexandrum		Vell.					NOTATYPE			Martius, C.F.P. von							Brasil																					M0171847
BS	M	M-0171848	Solanum hexandrum	S	Plantae	Magnoliophyta	Magnoliopsida	Solanales	Solanaceae	Solanum	hexandrum		Vell.					NOTATYPE			Pohl, J.B.E.							Brasil			Legit in Brasilia																		M0171848
BS	M	M-0171850	Solanum hexandrum	S	Plantae	Magnoliophyta	Magnoliopsida	Solanales	Solanaceae	Solanum	hexandrum		Vell.					NOTATYPE			Martius, C.F.P. von							Brasil			Habitat in primaevis sylvis supra Serra do Mar; Provinciae Sebastianopolit.																		M0171850
BM	SOLANACEAE_SOURCE_BR	34962	Solanum hexandrum	O	Plantae	Magnoliophyta	Dicotyledoneae	Solanales	Solanaceae	Solanum	hexandrum		Vell.	Knapp, S.	2009	01			s.n.		Herb.Vocke						Southern America	Brazil			sin. loc.
BM	SOLANACEAE_SOURCE_BR	20882	Solanum hexandrum	O	Plantae	Magnoliophyta	Dicotyledoneae	Solanales	Solanaceae	Solanum	hexandrum		Vell.	Knapp, S.	2007	03			6467		Isern, J.	1862	11	14			Southern America	Brazil	Rio de Janeiro		Petrópolis																		MA556176
BM	SOLANACEAE_SOURCE_BR	26052	Solanum hexandrum	O	Plantae	Magnoliophyta	Dicotyledoneae	Solanales	Solanaceae	Solanum	hexandrum		Vell.	Agra, M.F.	1997	06			2731		Miers, J.						Southern America	Brazil			Rio de Jan. [Janeiro], Organ Mts.																		BM000935430
BM	SOLANACEAE_SOURCE_BR	26053	Solanum hexandrum	O	Plantae	Magnoliophyta	Dicotyledoneae	Solanales	Solanaceae	Solanum	hexandrum		Vell.	Nee, M.	2000	01	01		57934		Hatschbach, G.	1992	10	10			Southern America	Brazil	Minas Gerais	Miradouro	Rod. BR-116.			-42.3425	-20.8906	20127												Arbusto 1.50 m, pétalas lilases.; Clareiras da mata.	BM000935431
BM	SOLANACEAE_SOURCE_BR	26054	Solanum hexandrum	O	Plantae	Magnoliophyta	Dicotyledoneae	Solanales	Solanaceae	Solanum	hexandrum		Vell.	Nee, M.	2000	01	01		5033		Mexia, Y.	1930	09	11			Southern America	Brazil	Minas Gerais		Viçosa, Agricultural College lands. São Miguel Road near km. 2.							665	665									Perennial herb 3 m high, many stemmed; purple flower; few leaved.; In damp, shady bottom of gulch off road.	BM000935432
BM	SOLANACEAE_SOURCE_BR	26055	Solanum hexandrum	O	Plantae	Magnoliophyta	Dicotyledoneae	Solanales	Solanaceae	Solanum	hexandrum		Vell.	Nee, M.	2000	01	01		4731		Mexia, Y.	1930	05	22			Southern America	Brazil	Minas Gerais		Viçosa, Agricultural College lands. Chacha Valley.							680	680									Spreading perennial herb 1.5 m high; light purple flower marbled with darker purple. Occasional.; Hill road in open tangle.	BM000935433
BM	SOLANACEAE_SOURCE_BR	26056	Solanum hexandrum	O	Plantae	Magnoliophyta	Dicotyledoneae	Solanales	Solanaceae	Solanum	hexandrum		Vell.	Nee, M.	2000	01	01		4118		Mexia, Y.	1929	12	17			Southern America	Brazil	Minas Gerais		Viçosa, Agricultural College lands. Eastern boundary.							680	680									Shrub up to 6 m. high; coiled inflorescence; fruit grows to size of small apple.; Thickety land. Abundant over this State and Espiritu Santo.	BM000935434
BM	SOLANACEAE_SOURCE_BR	26057	Solanum hexandrum	O	Plantae	Magnoliophyta	Dicotyledoneae	Solanales	Solanaceae	Solanum	hexandrum		Vell.	Nee, M.	1997	01	01		s.n.		Rugel, F.	1842	01	01			Southern America	Brazil			Florida.																		BM000935435
BM	SOLANACEAE_SOURCE_BR	26101	Solanum hexandrum	O	Plantae	Magnoliophyta	Dicotyledoneae	Solanales	Solanaceae	Solanum	hexandrum		Vell.	Knapp, S.	2014	09			800		Gardner, G.	1837	07				Southern America	Brazil			Corcovado. Rio de Janeiro.																		BM000935471
BM	SOLANACEAE_SOURCE_BR	26101	Solanum hexandrum	O	Plantae	Magnoliophyta	Dicotyledoneae	Solanales	Solanaceae	Solanum	hexandrum		Vell.	Knapp, S.	2014	09			800		Gardner, G.	1837	07				Southern America	Brazil			Corcovado. Rio de Janeiro.																		BM000935472
BM	SOLANACEAE_SOURCE_BR	26103	Solanum hexandrum	O	Plantae	Magnoliophyta	Dicotyledoneae	Solanales	Solanaceae	Solanum	hexandrum		Vell.	Knapp, S.	2014	09			120		Sellow, F.	1815	01	01			Southern America	Brazil			Rio de Janeiro.																		BM000935474
BM	SOLANACEAE_SOURCE_BR	26418	Solanum hexandrum	O	Plantae	Magnoliophyta	Dicotyledoneae	Solanales	Solanaceae	Solanum	hexandrum		Vell.	Knapp, S.	1999	01	01		47806		Hatschbach, G.	1984	04	11			Southern America	Brazil	Minas Gerais	Carlos Chagas	Rod. BR-418, km 112.			-40.7664	-17.7031	46387												Arbusto 2 m; flor violeta.; Base dos paredões rochosos.	BM000934972
BM	SOLANACEAE_SOURCE_BR	34968	Solanum hexandrum	O	Plantae	Magnoliophyta	Dicotyledoneae	Solanales	Solanaceae	Solanum	hexandrum		Vell.	Knapp, S.	2009	01			5560		Ostenfeld, C.H.	1911	08	22			Southern America	Brazil	Rio de Janeiro		Santa Teresa							200	200									1 m; b violett
BM	SOLANACEAE_SOURCE_BR	38950	Solanum hexandrum	O	Plantae	Magnoliophyta	Dicotyledoneae	Solanales	Solanaceae	Solanum	hexandrum		Vell.	Knapp, S.	2009	10			1		Wied-Neuwied, M.						Southern America	Brazil			sin. loc.
BM	SOLANACEAE_SOURCE_BR	39063	Solanum hexandrum	O	Plantae	Magnoliophyta	Dicotyledoneae	Solanales	Solanaceae	Solanum	hexandrum		Vell.	Knapp, S.	2009	10			4		Wied-Neuwied, M.						Southern America	Brazil			sin. loc.
BM	SOLANACEAE_SOURCE_BR	44864	Solanum hexandrum	O	Plantae	Magnoliophyta	Dicotyledoneae	Solanales	Solanaceae	Solanum	hexandrum		Vell.	Agra, M.F.	2010	04			7234		Agra, M.F.; Bohs, L.; Coelho, V.; Souza, P.P. de; Rodrigues, I.M.C.	2010	04	19			Southern America	Brazil	Minas Gerais		Entrance to Parque Estadual Serra do Brigadeiro near town of Araponga. Near Centro de Visitantes and Trilha dos Muriquis	-42.486611	-20.715528					1380	1400									Shrub ca. 1 m tall. Fruits green, surrounded by accrescent calyx.; Roadside.
BM	SOLANACEAE_SOURCE_BR	44864	Solanum hexandrum	O	Plantae	Magnoliophyta	Dicotyledoneae	Solanales	Solanaceae	Solanum	hexandrum		Vell.	Agra, M.F.	2010	04			7234		Agra, M.F.; Bohs, L.; Coelho, V.; Souza, P.P. de; Rodrigues, I.M.C.	2010	04	19			Southern America	Brazil	Minas Gerais		Entrance to Parque Estadual Serra do Brigadeiro near town of Araponga. Near Centro de Visitantes and Trilha dos Muriquis	-42.486611	-20.715528					1380	1400									Shrub ca. 1 m tall. Fruits green, surrounded by accrescent calyx.; Roadside.
BM	SOLANACEAE_SOURCE_BR	44882	Solanum hexandrum	O	Plantae	Magnoliophyta	Dicotyledoneae	Solanales	Solanaceae	Solanum	hexandrum		Vell.	Agra, M.F.	2010	04			7254		Agra, M.F.; Bohs, L.; Coelho, V.; Souza, P.P. de; Rodrigues, I.M.C.	2010	04	22			Southern America	Brazil	Minas Gerais		Mata do Seu Nico, outskirts of Viçosa	-42.844444	-20.793417					715	720									Shrub ca. 1 m tall. Plant with rusty pubescence. Corollas light purple; anthers yellow. Calyces with purplish cast, accrescent.; Mata estacional semidecidual.
BM	SOLANACEAE_SOURCE_BR	44882	Solanum hexandrum	O	Plantae	Magnoliophyta	Dicotyledoneae	Solanales	Solanaceae	Solanum	hexandrum		Vell.	Agra, M.F.	2010	04			7254		Agra, M.F.; Bohs, L.; Coelho, V.; Souza, P.P. de; Rodrigues, I.M.C.	2010	04	22			Southern America	Brazil	Minas Gerais		Mata do Seu Nico, outskirts of Viçosa	-42.844444	-20.793417					715	720									Shrub ca. 1 m tall. Plant with rusty pubescence. Corollas light purple; anthers yellow. Calyces with purplish cast, accrescent.; Mata estacional semidecidual.
BM	SOLANACEAE_SOURCE_BR	57149	Solanum hexandrum	O	Plantae	Magnoliophyta	Dicotyledoneae	Solanales	Solanaceae	Solanum	hexandrum		Vell.	Knapp, S.	2011	08			s.n.		Freire de Carvalho, L.	1987	05				Southern America	Brazil	Rio de Janeiro	Teresópolis	Granja Mafra, lote 13			-42.9656	-22.4122	38539												arbusto heliofilo, ca. 1.5 m; flores lilas; fruto esverdeado; local roçado	BH000039105
BM	SOLANACEAE_SOURCE_BR	73756	Solanum hexandrum	O	Plantae	Magnoliophyta	Dicotyledoneae	Solanales	Solanaceae	Solanum	hexandrum		Vell.	Knapp, S.	2014	01			13		Galland, Y.	1957	04				Southern America	Brazil	Rio de Janeiro		Jaboticaba Maria Cumplida, entre Petropolis et Teresopolis																		G00433002
BM	SOLANACEAE_SOURCE_BR	73775	Solanum hexandrum	O	Plantae	Magnoliophyta	Dicotyledoneae	Solanales	Solanaceae	Solanum	hexandrum		Vell.	Knapp, S.	2014	01	01	possible type ?	s.n.		Gaudichaud, C.	1830	01	01			Southern America	Brazil			sin. loc.																		G00131240
BM	SOLANACEAE_SOURCE_BR	73782	Solanum hexandrum	O	Plantae	Magnoliophyta	Dicotyledoneae	Solanales	Solanaceae	Solanum	hexandrum		Vell.	Knapp, S.	2014	01	01		533		Gardner, G.						Southern America	Brazil																					G00442991
BM	SOLANACEAE_SOURCE_BR	73783	Solanum hexandrum	O	Plantae	Magnoliophyta	Dicotyledoneae	Solanales	Solanaceae	Solanum	hexandrum		Vell.	Knapp, S.	2014	01	01		s.n.		Pohl, J.B.E.						Southern America	Brazil																					G00442990
BM	SOLANACEAE_SOURCE_BR	74177	Solanum hexandrum	O	Plantae	Magnoliophyta	Dicotyledoneae	Solanales	Solanaceae	Solanum	hexandrum		Vell.	Agra, M.F.	2009	12			7216		Agra, M.F.; Silva, B.M.; Daneu, L.; Bohs, L.	2009	12	08			Southern America	Brazil	Bahia		Camacan, RPPN Serra Bonita, road linking Camacan with Jacarecí. Reserve headquarters and lodging near the communication towers	-39.555556	-15.390361					800	800									Herb ca. 1 m tall. Buds only.; Mata atlântica.
BM	SOLANACEAE_SOURCE_BR	74177	Solanum hexandrum	O	Plantae	Magnoliophyta	Dicotyledoneae	Solanales	Solanaceae	Solanum	hexandrum		Vell.	Agra, M.F.	2009	12			7216		Agra, M.F.; Silva, B.M.; Daneu, L.; Bohs, L.	2009	12	08			Southern America	Brazil	Bahia		Camacan, RPPN Serra Bonita, road linking Camacan with Jacarecí. Reserve headquarters and lodging near the communication towers	-39.555556	-15.390361					800	800									Herb ca. 1 m tall. Buds only.; Mata atlântica.
BM	SOLANACEAE_SOURCE_BR	98861	Solanum hexandrum	O	Plantae	Magnoliophyta	Dicotyledoneae	Solanales	Solanaceae	Solanum	hexandrum		Vell.						1689		Giacomin, L.L.; Almeida, T.E.	2012	01	25			Southern America	Brazil	São Paulo	Ubatuba	Parque Estadual da Serra do Mar, Núcleo Picinguaba	-44.834194	-23.336583					59	59						154151			Arbusto, 1m, crescendo em clareira de floresta ombrófila densa, próximo a rio. Pétalas roxas, estames amarelos.; Trilha do Corisco. Cerca de 2km após a Casa da Farinha (sentido Picinguaba-Paraty)
NHMLondon	NHM-LONDON-BOT	BM000934972	Solanum hexandrum	S	Plantae				Solanaceae	Solanum	hexandrum		Vell.	Sandra (Sandy) Diane Knapp; b.1956; S.Knapp	1999				47806		Hatschbach, Gert - MBM, Museu Botânico Municipal - Museu Botânico Municipal	1984	04	11				Brasil	Minas Gerais		Rod. BR-418, km 112.														NHMUK:ecatalogue:5451182
NHMLondon	NHM-LONDON-BOT	BM000935430	Solanum hexandrum	S	Plantae				Solanaceae	Solanum	hexandrum		Vell.	M.F. Agra	1997	06			2731		John Miers; b.1789; d.1879; Miers							Brasil				-53.08982	-10.773109												NHMUK:ecatalogue:4344152
NHMLondon	NHM-LONDON-BOT	BM000935431	Solanum hexandrum	S	Plantae				Solanaceae	Solanum	hexandrum		Vell.	Michael (Mike) Nee; b.1947; M.Nee	2000				57934		Hatschbach, Gert - MBM, Museu Botânico Municipal - Museu Botânico Municipal	1992	10	10				Brasil	Minas Gerais		Rod. BR-116.														NHMUK:ecatalogue:5451315
NHMLondon	NHM-LONDON-BOT	BM000935432	Solanum hexandrum	S	Plantae				Solanaceae	Solanum	hexandrum		Vell.	Michael (Mike) Nee; b.1947; M.Nee	2000				5033		Ynes Enriquetta Julietta Mexia; b.1870; d.1938; Mexia	1930	09	11				Brasil	Minas Gerais		Viçosa, Viçosa, Agricultural College lands, near western boundary														NHMUK:ecatalogue:5451316
NHMLondon	NHM-LONDON-BOT	BM000935433	Solanum hexandrum	S	Plantae				Solanaceae	Solanum	hexandrum		Vell.	Michael (Mike) Nee; b.1947; M.Nee	2000				4731		Ynes Enriquetta Julietta Mexia; b.1870; d.1938; Mexia	1930	05	22				Brasil	Minas Gerais		Viçosa, Viçosa, Agricultural College lands, near western boundary														NHMUK:ecatalogue:5451317
NHMLondon	NHM-LONDON-BOT	BM000935434	Solanum hexandrum	S	Plantae				Solanaceae	Solanum	hexandrum		Vell.	Michael (Mike) Nee; b.1947; M.Nee	2000				4118		Ynes Enriquetta Julietta Mexia; b.1870; d.1938; Mexia	1929	12	17				Brasil	Minas Gerais		Viçosa, Viçosa, Agricultural College lands, near western boundary														NHMUK:ecatalogue:5451318
NHMLondon	NHM-LONDON-BOT	BM000935435	Solanum hexandrum	S	Plantae				Solanaceae	Solanum	hexandrum		Vell.	Michael (Mike) Nee; b.1947; M.Nee	1997				s.n.		F. Rugel	1842	01	01				Brasil				-53.08982	-10.773109												NHMUK:ecatalogue:4346091
NHMLondon	NHM-LONDON-BOT	BM000935471	Solanum hexandrum	S	Plantae				Solanaceae	Solanum	hexandrum		Vell.						800		George Gardner; b.1812; d.1849; Gardner	1837	07	01				Brasil				-53.08982	-10.773109												NHMUK:ecatalogue:5451338			<a href="http://www.nhm.ac.uk/services/media-store/asset/dfb96af5432fa76dc4bd09c64eb580d050034077/contents/preview" target="other" class="eLink"> <mi>dwc_moreinfo</mi></a>
NHMLondon	NHM-LONDON-BOT	BM000935472	Solanum hexandrum	S	Plantae				Solanaceae	Solanum	hexandrum		Vell.						800		George Gardner; b.1812; d.1849; Gardner	1837	07	01				Brasil				-53.08982	-10.773109												NHMUK:ecatalogue:5451339
NHMLondon	NHM-LONDON-BOT	BM000935474	Solanum hexandrum	S	Plantae				Solanaceae	Solanum	hexandrum		Vell.						1201		Friedrich Sellow; b.1789; d.1831; Sellow	1815	01	01				Brasil				-53.08982	-10.773109												NHMUK:ecatalogue:4345804
MOBOT	MOBOT_BR	100704785	Solanum hexandrum	S	Plantae				Solanaceae	Solanum	hexandrum		Vell.	M. Nee	2013				Fiaschi 1987		Pedro Fiaschi|André M. Amorim|J. Lima Paixão|Sérgio C. de Sant'Ana	2004	02	14			South America	Brazil	Bahia	Jussari	Estrada da Jussari para Palmira, entrada à esq. Ca. 7.5 km após Jussari. Fazenda Teimoso. RPPN Serra do Teimoso.	-39.5361111	-15.1602778
MOBOT	MOBOT_BR	100811597	Solanum hexandrum	S	Plantae				Solanaceae	Solanum	hexandrum		Vell.	M.H. Nee	2007				Carvalho 6866		André M. de Carvalho|Jomar G. Jardim|Sérgio C. de Sant'Ana|J. Lima Paixão	2000	05	06			South America	Brazil	Bahia	Jussari	Reserva Particular do Patrimônio Natural (RPPN), entrada a 7.5 km na Rod. Jussari/Palmira. Faz. Teimoso, 1.7 km da entrada. Mata Higrófila Sul Baiana.	-39.5311111	-15.1544444
MOBOT	MOBOT_BR	2969216	Solanum hexandrum	S	Plantae				Solanaceae	Solanum	hexandrum		Vell.	M.Nee	2003				Mexia 4731		Ynés Mexia	1930	05	22			South America	Brazil	Minas Gerais		Viça, Agricultural College lands. Chacha Valley; hill road in open tangle.							680	680
MOBOT	MOBOT_BR	2969417	Solanum hexandrum	S	Plantae				Solanaceae	Solanum	hexandrum		Vell.	M. Nee	2003				Mexia 4118		Ynés Mexia	1929	12	17			South America	Brazil	Minas Gerais		Eastern boundary, thickety land, Vicosa,Agricultural College Lands							680	680
MOBOT	MOBOT_BR	2969570	Solanum hexandrum	S	Plantae				Solanaceae	Solanum	hexandrum		Vell.	M.Nee	2003				Mexia 4118		Ynés Mexia	1929	12	17			South America	Brazil	Minas Gerais		Viçosa,Agricultural College lands. Eastern boundary; thickety land							680	680
MOBOT	MOBOT_BR	2969767	Solanum hexandrum	S	Plantae				Solanaceae	Solanum	hexandrum		Vell.	M.Nee	2003				Mexia 5033		Ynés Mexia	1930	09	11			South America	Brazil	Minas Gerais		Vicosa, Agricultural College lands. So Miguel Road near km. 2; in damp, shady bottom of gulch off road.							665	665
MOBOT	MOBOT_BR	2969822	Solanum hexandrum	S	Plantae				Solanaceae	Solanum	hexandrum		Vell.						Erickson 30		H.T. Erickson	1966	12	17			South America	Brazil	Rio de Janeiro		Teresopolis
MOBOT	MOBOT_BR	2970465	Solanum hexandrum	S	Plantae				Solanaceae	Solanum	hexandrum		Vell.	M.Nee	1991				Riedel 197		Ludwig Riedel	1821					South America	Brazil
MOBOT	MOBOT_BR	2970503	Solanum hexandrum	S	Plantae				Solanaceae	Solanum	hexandrum		Vell.						Erickson 1		H.T. Erickson	1966	12	13			South America	Brazil	Minas Gerais		Divian de Uba'
MOBOT	MOBOT_BR	2973555	Solanum hexandrum	S	Plantae				Solanaceae	Solanum	hexandrum		Vell.	M.Nee	2003				Anonymous 32		Anonymous						South America	Brazil
MOBOT	MOBOT_BR	456329	Solanum hexandrum	S	Plantae				Solanaceae	Solanum	hexandrum		Vell.	M. Nee	1986				Gentry 49340	85-20	Alwyn H. Gentry|Elsa M. Zardini	1985	01	08			South America	Brazil	São Paulo	Ubatuba	Agriculture Experiment Station. Along Río Comprido.	-45	-23.5					100	100
UnB	HBVIRTFLBRAS		Solanum hexandrum	O	Plantae				Solanaceae	Solanum	hexandrum		Vell.						s.n.		Ackermann, ?						Southern America	Brazil	Minas Gerais		et in Minarum provincia
UnB	HBVIRTFLBRAS		Solanum hexandrum	O	Plantae				Solanaceae	Solanum	hexandrum		Vell.						s.n.		Martius, CFP						Southern America	Brazil			in profundis sylvarum primaerarum supra Serra do Mar, prov. Sebastianopolitanae																	Octobri ad Decembrem florens
UnB	HBVIRTFLBRAS		Solanum hexandrum	O	Plantae				Solanaceae	Solanum	hexandrum		Vell.						s.n.		Sellow, F						Southern America	Brazil			In eadem Brasiliae provincia
UnB	HBVIRTFLBRAS		Solanum hexandrum	O	Plantae				Solanaceae	Solanum	hexandrum		Vell.						s.n.		Wied-Neuwied, MAP Prince						Southern America	Brazil			prope Campos et ad Paraíba																	Septembri et Octobri florens
UnB	HBVIRTFLBRAS		Solanum hexandrum	O	Plantae				Solanaceae	Solanum	hexandrum		Vell.						s.n.		Sellow, F						Southern America	Brazil			in Brasilia australiore																	Herb. Reg. Berol
UnB	HBVIRTFLBRAS		Solanum hexandrum	O	Plantae				Solanaceae	Solanum	hexandrum		Vell.						s.n.		Martius, CFP						Southern America	Brazil			In Brasilia provincia Sebastianopolitana, in sylvis udis prope S. Cruz et Tagoahy, nec non prope Rozario																	Decembri florens
UnB	HBVIRTFLBRAS		Solanum hexandrum	O	Plantae				Solanaceae	Solanum	hexandrum		Vell.						s.n.		Raben, FC						Southern America	Brazil			In eadem Brasiliae provincia
UnB	HBVIRTFLBRAS		Solanum hexandrum	O	Plantae				Solanaceae	Solanum	hexandrum		Vell.						s.n.		Schott, HW						Southern America	Brazil			prope Magé
UnB	HBVIRTFLBRAS		Solanum hexandrum	O	Plantae				Solanaceae	Solanum	hexandrum		Vell.						s.n.		Pohl, JBE						Southern America	Brazil	Rio de Janeiro		in M. Corcovado
UnB	HBVIRTFLBRAS		Solanum hexandrum	O	Plantae				Solanaceae	Solanum	hexandrum		Vell.						s.n.		?							?
F	F_BOTANY_BR	V0176167F	Solanum hexandrum	S	Plantae	Spermatophyta	Dicotyledoneae		Solanaceae	Solanum	hexandrum																South America	BRAZIL				-52.8731	-10.8339
F	F_BOTANY_BR	V0176168F	Solanum hexandrum	S	Plantae	Spermatophyta	Dicotyledoneae		Solanaceae	Solanum	hexandrum																South America	BRAZIL				-52.8731	-10.8339
F	F_BOTANY_BR		Solanum hexandrum	S	Plantae	Spermatophyta	Dicotyledoneae		Solanaceae	Solanum	hexandrum			RRC ID Flag					5033	5033	Y. Mexía	1930	09	11			South America	Brazil	Minas Gerais			-44	-18
F	F_BOTANY_BR		Solanum hexandrum	S	Plantae	Spermatophyta	Dicotyledoneae		Solanaceae	Solanum	hexandrum			RRC ID Flag					154	154	C. L. F. Ichaso	1966	09	22			South America	Brazil	Rio de Janeiro			-42.5	-22
FZB-BH	BHZB	1572	Solanum hexandrum	S	Plantae				Solanaceae	Solanum	hexandrum			L.L. Giacomin	2008	04					Soares, M.E. & Costa, E.P.	1992	09	25				Brasil	ES	Santa Marta	Posto de Fiscalização IBAMA																	As flores são usadas na forma de decocto para dor de barriga. Entrevistado: José Liberato de Jesus. Doação: Fund. Biodiversitas nº 643. <ll>dwc_commonname:</ll> Joá roxo
ESALQ	ESA	72521	Solanum hexandrum	S	Plantae	Magnoliophyta			Solanaceae	Solanum	hexandrum								5885		Salino, A. ; Melo, L.C.N.	2000	11	14				Brasil	Minas Gerais	Santa Rita de Jacutinga				-44.0950012207031	-22.1494007110596	20148													ESA072521
ESALQ	ESA	69661	Solanum hexandrum	S	Plantae	Magnoliophyta			Solanaceae	Solanum	hexandrum								4112		Salino, A.	1998	03	21				Brasil	Minas Gerais	Muriaé				-42.3664016723633	-21.1305999755859	32715													ESA069661
ESALQ	ESA	12622	Solanum hexandrum	S	Plantae	Magnoliophyta			Solanaceae	Solanum	hexandrum			Giacomin, L.L.	2009	08			150		Campos, M.T.V.A. et al.	1991	04	20				Brasil	São Paulo	Ilhabela				-45.3499984741211	-23.7700004577637	23719													ESA012622
ESALQ	ESA	33746	Solanum hexandrum	S	Plantae	Magnoliophyta			Solanaceae	Solanum	hexandrum			Giacomin, L.L.	2009	08			1280		Lombardi, J.A.	1996	07	16				Brasil	Minas Gerais	Marliéria				-42.7322006225586	-19.7122001647949	28215													ESA033746
ESALQ	ESA	53625	Solanum hexandrum	S	Plantae	Magnoliophyta			Solanaceae	Solanum	hexandrum			Giacomin, L.L.	2009	08			625		Lucas, E.J. et al.	2006	11	21				Brasil	Rio de Janeiro	Teresópolis				-42.9655990600586	-22.4122009277344	38539													ESA053625
ESALQ	ESA	101041	Solanum hexandrum	S	Plantae	Magnoliophyta			Solanaceae	Solanum	hexandrum								4513		Stehmann, J.R.	2006	11	22				Brasil	São Paulo	Queluz				-44.7700004577637	-22.5300006866455	14382													ESA101041
ESALQ	ESA	86330	Solanum hexandrum	S	Plantae	Magnoliophyta			Solanaceae	Solanum	hexandrum			Giacomin, L.L.	2009	08			3878		Silva, J.M.	2003	11	07				Brasil	Paraná	Quatro Barras				-49.0769004821777	-25.3656005859375	17116													ESA086330
ESALQ	ESA	35686	Solanum hexandrum	S	Plantae	Magnoliophyta			Solanaceae	Solanum	hexandrum								894		Souza, J.P. et al.	1996	12	14				Brasil	São Paulo	Cunha				-44.9599990844727	-23.0699996948242	38855													ESA035686
ESALQ	ESA	48450	Solanum hexandrum	S	Plantae	Magnoliophyta			Solanaceae	Solanum	hexandrum										Costa, L.V.	1998	01					Brasil	Minas Gerais	Itamarati de Minas				-42.817798614502	-21.4158000946045	10054													ESA048450
MBM	MBM	340590	Solanum hexandrum	S	Plantae				Solanaceae	Solanum	hexandrum		Vell.						7515		Krieger, L	1969	10				Southern America	Brazil	Minas Gerais	Juiz de Fora				-43.3502998352051	-21.7642002105713	36144												Arbusto alto, fl. roxas	MBM340590
MBM	MBM	390204	Solanum hexandrum	S	Plantae				Solanaceae	Solanum	hexandrum		Vell.						1827		Giacomin, LL	2012	06	02			Southern America	Brazil	Rio de Janeiro	Santa Maria Madalena	Estrada de subida para o Mirante da Torre (morro da antena)	-42.031667	-21.978333					745	745									Arbusto ereto, 3m. Flores com pétalas roxas, estames amarelos. Frutos imaturos alvos.; Área degradada limítrode à plantação de Eucalyptus spp.; margem de estrada não pavimentada.	MBM390204
MBM	MBM	404873	Solanum hexandrum	S	Plantae				Solanaceae	Solanum	hexandrum		Vell.	Kutschenko, DC	2015	11	09		521		Rigon, LGC	2015	10	02			Southern America	Brazil	Rio de Janeiro	Petrópolis	Conglomerado 66-1-1-1			-43.1786003112793	-22.5049991607666	36524												Árvore com 4,9 m de altura, base reta, casca interna amarela e casca externa cinza, grossa, fissurada, com desprendimento da casca em placas lenhosas. Flor verde.; Encontra-se como árvore fora da floresta, em área de campo, com solo	MBM404873
SMITHSONIAN	US	1194943	Solanum hexandrum	PreservedSpecimen	Plantae		Dicotyledonae	Solanales	Solanaceae	Solanum	hexandrum		Vell.								A. F. M. Glaziou						South America - Neotropics	Brazil																				<a href="http://n2t.net/ark:/65665/337a4391d-0131-422c-8494-be12d740dee2" target="other" class="eLink"> <mi>dwc_moreinfo</mi></a>
SMITHSONIAN	US	1420642	Solanum hexandrum	PreservedSpecimen	Plantae		Dicotyledonae	Solanales	Solanaceae	Solanum	hexandrum		Vell.								-- Glocker	1905	01	15			South America - Neotropics	Brazil	Bahia																			<a href="http://n2t.net/ark:/65665/31bef644a-50d6-4c78-a8b7-8cdb8e559f1b" target="other" class="eLink"> <mi>dwc_moreinfo</mi></a>
SMITHSONIAN	US	1570230	Solanum hexandrum	PreservedSpecimen	Plantae		Dicotyledonae	Solanales	Solanaceae	Solanum	hexandrum		Vell.								P. Armond						South America - Neotropics	Brazil																				<a href="http://n2t.net/ark:/65665/368d4ebc8-fcd1-4df6-bc55-2c56ce1ba34f" target="other" class="eLink"> <mi>dwc_moreinfo</mi></a>
SMITHSONIAN	US	1573850	Solanum hexandrum	PreservedSpecimen	Plantae		Dicotyledonae	Solanales	Solanaceae	Solanum	hexandrum		Vell.								L. Riedel						South America - Neotropics	Brazil	Rio de Janeiro	Rio de Janeiro	Corcovado			-43.2075004577637	-22.9027996063232	57442												<a href="http://n2t.net/ark:/65665/3c8394df3-1c47-4867-b703-cfac19543207" target="other" class="eLink"> <mi>dwc_moreinfo</mi></a>
SMITHSONIAN	US	1616932	Solanum hexandrum	PreservedSpecimen	Plantae		Dicotyledonae	Solanales	Solanaceae	Solanum	hexandrum		Vell.								A. Loefgren & Edwall	1892	08	16			South America - Neotropics	Brazil	São Paulo	São Luís do Paraitinga	São Luiz do Paraitinga			-45.310001373291	-23.2199993133545	27362												<a href="http://n2t.net/ark:/65665/30c0c140a-a5ac-4876-b495-c691f2812afb" target="other" class="eLink"> <mi>dwc_moreinfo</mi></a>
SMITHSONIAN	US	2343023	Solanum hexandrum	PreservedSpecimen	Plantae		Dicotyledonae	Solanales	Solanaceae	Solanum	hexandrum		Vell.								O. Barth	1959	11	02			South America - Neotropics	Brazil	Rio de Janeiro	Petrópolis				-43.1786003112793	-22.5049991607666	36524												<a href="http://n2t.net/ark:/65665/3c53541a7-09ac-4500-877c-ad63c832a2a6" target="other" class="eLink"> <mi>dwc_moreinfo</mi></a>
SMITHSONIAN	US	2436245	Solanum hexandrum	PreservedSpecimen	Plantae		Dicotyledonae	Solanales	Solanaceae	Solanum	hexandrum		Vell.								G. F. J. Pabst & R. M. Klein	1959	11	29			South America - Neotropics	Brazil	Rio de Janeiro	Petrópolis	Independência			-43.1786003112793	-22.5049991607666	36524		800	800									<a href="http://n2t.net/ark:/65665/366cc46ce-393a-42b9-9663-90b4b2d711ec" target="other" class="eLink"> <mi>dwc_moreinfo</mi></a>
SMITHSONIAN	US	2688033	Solanum hexandrum	PreservedSpecimen	Plantae		Dicotyledonae	Solanales	Solanaceae	Solanum	hexandrum		Vell.								G. Eiten & L. T. Eiten	1966	11	24			South America - Neotropics	Brazil	São Paulo	Caraguatatuba	Along road 12-15 km N from city of Caraguatatuba towards Paraibuna. Seaward face of Serra do MAr	-45.45	-23.58					500	500									<a href="http://n2t.net/ark:/65665/3045a70a3-d9cc-41b7-910a-1843b8e588d7" target="other" class="eLink"> <mi>dwc_moreinfo</mi></a>
SMITHSONIAN	US	2688034	Solanum hexandrum	PreservedSpecimen	Plantae		Dicotyledonae	Solanales	Solanaceae	Solanum	hexandrum		Vell.								G. Eiten & L. T. Eiten	1966	11	24			South America - Neotropics	Brazil	São Paulo	Caraguatatuba	Along road 12-15 km N from city of Caraguatatuba towards Paraibuna. Seaward face of Serra do Mar, road through tall evergreen virgin forest	-45.45	-23.58					500	500									<a href="http://n2t.net/ark:/65665/3c9263a72-cc1f-47a1-9b99-1f28ac09b4ad" target="other" class="eLink"> <mi>dwc_moreinfo</mi></a>
INPA	INPA	17939	Solanum hexandrum	S	Plantae	Dicotyledon Asterids		Solanales	Solanaceae	Solanum	hexandrum		Vell.	Whalen, MD	1982				2397		Prance, GT	1966	09	19			Southern America	Brasil	Amazonas	Boca do Acre	Boca do Acre, Opposite Boca do Acre, rio Purus. Capoeira on high ground terra firme.			-67.3977966308594	-8.75222015380859	220472													INPA0017939
UNESP-IBB	BOTU	12442	Solanum hexandrum	S	Plantae				Solanaceae	Solanum	hexandrum		Vell.						10		Gemtchújnicov, I.D.	1959	11	28				Brasil	São Paulo	Ubatuba				-45.0699996948242	-23.4300003051758	34265												for lilás-clara	BOTU012442
UNESP-IBB	BOTU	6814	Solanum hexandrum	S	Plantae				Solanaceae	Solanum	hexandrum		Vell.						123020876		Chagas, F.N.	1976	08	02				Brasil	Amazonas	Humaitá		-63.166667	-7.516667															Arbusto, 2m de altura, 5 cm. De diâmetro, flores roxas com estigmas amarelados, algumas flores lilás, presença de espinho, folha aveludada, presença de coleópteros.	BOTU006814
IF	SPSF	21586	Solanum hexandrum	PreservedSpecimen	Plantae	Magnoliophyta	Magnoliopsida	Solanales	Solanaceae	Solanum	hexandrum								894		J.P.Souza	1996	12	14			América do Sul	Brasil	SP	Cunha	P.E.Serra do Mar - Núcleo Cunha			-44.9599990844727	-23.0699996948242	38855												COLETA: XLS: SPSFAntigo; GEOGRAFIA: floresta a beira de estrada&nf;;
IF	SPSF	45502	Solanum hexandrum	PreservedSpecimen	Plantae	Magnoliophyta	Magnoliopsida	Solanales	Solanaceae	Solanum	hexandrum		Vell.						875		L.L.Giacomin & P.L.Viana & N.F.O.Mota	2009	04	09			América do Sul	Brasil	SP	Bananal	Estação Ecológica			-44.3199996948242	-22.6800003051758	26795												COLETA: Arbusto escandente, flores com cálice verde e lacínios lilases; corola branca a lilás.; GEOGRAFIA: Margem da estrada que dá acesso à Estação.;
UFLA	ESAL	27138	Solanum hexandrum	S	Plantae				Solanaceae	Solanum	hexandrum		Vell.	Sobral, M					202		Batista, TA; Moraes, C; Boechat, C							Brasil	Minas Gerais	Itamonte	Hotel casa alpina			-44.8699989318848	-22.283899307251	26914												; ; ; frutos verdes esbranquiçados e pegajosos
UFV	VIC	001763	Solanum hexandrum	S	Plantae				Solanaceae	Solanum	hexandrum		Vell						s.n.		Kulhmann	1935	01	08				Brasil	Minas Gerais	Viçosa	ESAV			-42.8819007873535	-20.7539005279541	13937													VIC001763
UFV	VIC	004222	Solanum hexandrum	S	Plantae				Solanaceae	Solanum	hexandrum		Vell						2076		Irwin, H.S.	1958	11	12				Brasil	Minas Gerais	Viçosa	ESAV			-42.8819007873535	-20.7539005279541	13937												Small few -branched tree to 4 m, in stream valley, Eucalyptus shade, red clay soil, co and fruiting ca violet. Anthers orange, occasional.	VIC004222
UFV	VIC	005205	Solanum hexandrum	S	Plantae				Solanaceae	Solanum	hexandrum		Vell						s.n.		Krieger, E.P.	1977	02	05				Brasil	Minas Gerais		Chácara Sítio da Divina providência																	Arbusto alto, até 3 m, flores roxas grandes.	VIC005205
UFV	VIC	005564	Solanum hexandrum	S	Plantae				Solanaceae	Solanum	hexandrum		Vell						259		Vidal, M.R.R.	1964	06	25				Brasil	Minas Gerais	Viçosa	Esa			-42.8819007873535	-20.7539005279541	13937												Solo argiloso, arbusto, flor de cálice e corola roxas algumas no local.	VIC005564
UFV	VIC	009661	Solanum hexandrum	S	Plantae				Solanaceae	Solanum	hexandrum		Vell						406		Vieira, M.F.; Okano, R.M.C.	1986	07	29				Brasil	Minas Gerais	Canaã	cascata a 4 km de cachoeira grande.			-42.619701385498	-20.6858005523682	11848												Subarbusto de cerca de 1,7 m de altura , flores de cálice vinho e corola lilás. Frutos na carpoteca sob n°368.	VIC009661
UFV	VIC	012602	Solanum hexandrum	S	Plantae				Solanaceae	Solanum	hexandrum		Vell						s.n.		Heringer, E.P.	1941	12	10				Brasil	Minas Gerais	Cel. Pacheco	Estação Experimental																		VIC012602
UFV	VIC	016693	Solanum hexandrum	S	Plantae				Solanaceae	Solanum	hexandrum		Vell						s.n.		Borges, M.F.; et al.	1996	10	14				Brasil	Minas Gerais	Viçosa	Após ambulatório no pasto da zootecnia			-42.8819007873535	-20.7539005279541	13937												Flor lilás.	VIC016693
UFV	VIC	016697	Solanum hexandrum	S	Plantae				Solanaceae	Solanum	hexandrum		Vell						s.n.		Borges, M.F.; et al.	1996	12	02				Brasil	Minas Gerais	Viçosa	Após ambulatório no pasto da zootecnia			-42.8819007873535	-20.7539005279541	13937												Árvore e flor roxa.	VIC016697
UFV	VIC	022911	Solanum hexandrum	S	Plantae				Solanaceae	Solanum	hexandrum		Vell						s.n.		Mota, G.L.O.; et al.	1997	05	20				Brasil	Minas Gerais	Viçosa	Após ambulatório no pasto da zootecnia			-42.8819007873535	-20.7539005279541	13937												Perene, arbustiva, 1-2 m, pubescente, flor de corola azul violáceae.	VIC022911
UFV	VIC	024138	Solanum hexandrum	S	Plantae				Solanaceae	Solanum	hexandrum		Vell						s.n.		BVE230	1999	12	02				Brasil	Minas Gerais	Viçosa	Área de Mecanização			-42.8819007873535	-20.7539005279541	13937												Planta de ca de 1,5 m, cor da flor lilás , folha verde, visitada por beija flor.	VIC024138
UFV	VIC	025274	Solanum hexandrum	S	Plantae				Solanaceae	Solanum	hexandrum		Vell						827		Garcia, F.C.P.; Temponi, L.G.	2000	06	15				Brasil	Minas Gerais	Marliéria	PERD, Trilha do Anibal			-42.7322006225586	-19.7122001647949	28215												Arbusto de ca de 1,5 m de altura, flores de corola roxa, estames amarelos.	VIC025274
UFV	VIC	052705	Solanum hexandrum	S	Plantae				Solanaceae	Solanum	hexandrum		Vell	H.V. Pinto Junior	2019	05	17		496		H.V. Pinto Junior; Muller, L.A.C.; Sperandio, T.	2019	01	25				Brasil	Espírito Santo	Nova Venécia	APA Pedra do Elefante, Trilha para a Pedra do Elefante	-40.766667	-19.288889					674	674									Planta com +/- 1.20m, borda de trilha, folhas verdes com tricomas, flores brancas com estames amarelos, sol, abundante, fruto verde e redondo.	VIC052705
UFV	VIC	43862	Solanum hexandrum	S	Plantae				Solanaceae	Solanum	hexandrum		Vell						28		Azevedo, I F P	2014	05	04				Brasil	Minas Gerais	Viçosa	Mata do Paraíso. Trilha Caminho das Águas			-42.8819007873535	-20.7539005279541	13937												Arbusto, cerca de 3m de altura, ramos com acúleos, folhas isoladas, margem denteada, flores em cima escorpioide, corola violácea	VIC043862
EAO	IAN	106743	Solanum hexandrum	PreservedSpecimen	Plantae	Dicotiledônea			Solanaceae	Solanum	hexandrum		Vell.	Giacomin, LL	2019	05	07		17651		Magalhães, MG	1958	08				Southern America	Brasil		Teófilo Otoni				-41.505298614502	-17.8575000762939	62594													IAN106743
EAO	IAN	93879	Solanum hexandrum	PreservedSpecimen	Plantae	Dicotiledônea			Solanaceae	Solanum	hexandrum		Vell.	Giacomin, LL	2011	07			2777		Glaziou, AFM	1875	02	10				Paris																					IAN093879
NYBG	NYBG_BR	00700483	Solanum hexandrum	PreservedSpecimen	Plantae	Magnoliophyta		Solanales	Solanaceae	Solanum	hexandrum		Vell.						5033		Y. E. J. Mexia	1930	09	11			South America	Brazil	Minas Gerais	Viçosa	Viçosa, Agricultural College lands. São Miguel Road near km. 2	-42.8817	-20.7542					665	665				sheet					<a href="http://sweetgum.nybg.org/science/vh/specimen_details.php?irn=835974" target="other" class="eLink"> <mi>dwc_moreinfo</mi></a>	NY00700483
NYBG	NYBG_BR	00700485	Solanum hexandrum	PreservedSpecimen	Plantae	Magnoliophyta		Solanales	Solanaceae	Solanum	hexandrum		Vell.						4731		Y. E. J. Mexia	1930	05	22			South America	Brazil	Minas Gerais	Viçosa	Viçosa, Agricultural College lands. Chacha Valley	-42.860644	-20.766686					680	680				sheet					<a href="http://sweetgum.nybg.org/science/vh/specimen_details.php?irn=835978" target="other" class="eLink"> <mi>dwc_moreinfo</mi></a>	NY00700485
NYBG	NYBG_BR	00750035	Solanum hexandrum	PreservedSpecimen	Plantae	Magnoliophyta		Solanales	Solanaceae	Solanum	hexandrum		Vell.	M. H. Nee	2001				2706		A. M. Amorim	1998	11	21			South America	Brazil	Bahia	Jussari	Rod. Jussari-Palmira. Entrada ca. 7.5 km de Jussari. Faz. Teimoso. RPPN Serra do Teimoso	-39.5286	-15.1581										fluid-preserved					<a href="http://sweetgum.nybg.org/science/vh/specimen_details.php?irn=913131" target="other" class="eLink"> <mi>dwc_moreinfo</mi></a>	NY00750035
NYBG	NYBG_BR	00962432	Solanum hexandrum	PreservedSpecimen	Plantae	Magnoliophyta		Solanales	Solanaceae	Solanum	hexandrum		Vell.	M. H. Nee	1995				250		I. D. de Gemtchújnicov	1957	08				South America	Brazil	São Paulo	Sao Sebastiao	Fazenda Sr. Granato.	-45.4097	-23.7603										sheet					<a href="http://sweetgum.nybg.org/science/vh/specimen_details.php?irn=1084817" target="other" class="eLink"> <mi>dwc_moreinfo</mi></a>	NY00962432
NYBG	NYBG_BR	02707645	Solanum hexandrum	PreservedSpecimen	Plantae	Magnoliophyta		Solanales	Solanaceae	Solanum	hexandrum		Vell.						543		I. G. Costa	2014	09	13			South America	Brazil	Rio de Janeiro	São Fidélis	Serra de Itacolomy, em Zona de Amortecimento do Parque Estadual do Desengano. em mata à margem da estrada.	-41.845278	-21.816389										sheet					<a href="http://sweetgum.nybg.org/science/vh/specimen_details.php?irn=2991550" target="other" class="eLink"> <mi>dwc_moreinfo</mi></a>	NY02707645
NYBG	NYBG_BR	1921583	Solanum hexandrum	PreservedSpecimen	Plantae	Magnoliophyta		Solanales	Solanaceae	Solanum	hexandrum		Vell.						1689		L. L. Giacomin	2012	01	25			South America	Brazil	São Paulo	Ubatuba	Parque Estadual da Serra do Mar, Núcleo Picinguaba, Trilha do Corisco. Ca. de 2 km após a Casa da Farinha (sentido Picinguaba-Paraty)	-44.8342	-23.3367					59	59				sheet					<a href="http://sweetgum.nybg.org/science/vh/specimen_details.php?irn=2288838" target="other" class="eLink"> <mi>dwc_moreinfo</mi></a>	NY01921583
NYBG	NYBG_BR	566239	Solanum hexandrum	PreservedSpecimen	Plantae	Magnoliophyta		Solanales	Solanaceae	Solanum	hexandrum		Vell.	M. H. Nee	2001				2706		A. M. Amorim	1998	11	21			South America	Brazil	Bahia	Jussari	Rod. Jussari-Palmira. Entrada ca. 7.5 km de Jussari. Faz. Teimoso. RPPN Serra do Teimoso	-39.5286	-15.1581										sheet					<a href="http://sweetgum.nybg.org/science/vh/specimen_details.php?irn=329685" target="other" class="eLink"> <mi>dwc_moreinfo</mi></a>	NY00566239
NYBG	NYBG_BR	719816	Solanum hexandrum	PreservedSpecimen	Plantae	Magnoliophyta		Solanales	Solanaceae	Solanum	hexandrum		Vell.						648		J. A. Lira Neto	1997	08	26			South America	Brazil	Rio de Janeiro	Duque de Caxias	Reserva da Petrobas. Trilha do Sangradouro	-43.25	-22.53333					60	60				sheet					<a href="http://sweetgum.nybg.org/science/vh/specimen_details.php?irn=2520350" target="other" class="eLink"> <mi>dwc_moreinfo</mi></a>	NY00719816
NYBG	NYBG_BR	770593	Solanum hexandrum	PreservedSpecimen	Plantae	Magnoliophyta		Solanales	Solanaceae	Solanum	hexandrum		Vell.	J. R. Stehmann	2000	02	04		s.n.		F. C. Hoehne	1940	05	27			South America	Brazil	São Paulo		Serra de Ubatuba.												sheet					<a href="http://sweetgum.nybg.org/science/vh/specimen_details.php?irn=329683" target="other" class="eLink"> <mi>dwc_moreinfo</mi></a>	NY00770593
NYBG	NYBG_BR	770594	Solanum hexandrum	PreservedSpecimen	Plantae	Magnoliophyta		Solanales	Solanaceae	Solanum	hexandrum		Vell.	M. de F. Agra	1996				1889		M. Kirizawa	1987	08	20			South America	Brazil	Rio de Janeiro	Paratí	Estrada Parati-Cunha. 8km de Paratí.	-44.798046	-23.21177										sheet					<a href="http://sweetgum.nybg.org/science/vh/specimen_details.php?irn=329681" target="other" class="eLink"> <mi>dwc_moreinfo</mi></a>	NY00770594
NYBG	NYBG_BR	770595	Solanum hexandrum	PreservedSpecimen	Plantae	Magnoliophyta		Solanales	Solanaceae	Solanum	hexandrum		Vell.	M. H. Nee	1986				49340		A. H. Gentry	1985	01	08			South America	Brazil	São Paulo	Ubatuba	Agriculture Experiment Station. Along Río Comprido.	-45	-23.5					100	100				sheet					<a href="http://sweetgum.nybg.org/science/vh/specimen_details.php?irn=329679" target="other" class="eLink"> <mi>dwc_moreinfo</mi></a>	NY00770595
NYBG	NYBG_BR	770597	Solanum hexandrum	PreservedSpecimen	Plantae	Magnoliophyta		Solanales	Solanaceae	Solanum	hexandrum		Vell.	M. H. Nee	2000				1743		J. G. Jardim	1998	04	10			South America	Brazil	Bahia	Jussari	Rod. Jussari/Palmeira, entrada ca. 7.5km percorrendo mais 1.7km até a sede da Faz. Teimoso. Serra do Teimoso, Reserva Particular do Patrimônio Natural Serra do Teimoso.	-39.58	-15.17					300	450				sheet					<a href="http://sweetgum.nybg.org/science/vh/specimen_details.php?irn=329680" target="other" class="eLink"> <mi>dwc_moreinfo</mi></a>	NY00770597
NYBG	NYBG_BR	770598	Solanum hexandrum	PreservedSpecimen	Plantae	Magnoliophyta		Solanales	Solanaceae	Solanum	hexandrum		Vell.	V. S. Sampaio	2016	08			5135		P. K. H. Dusén	1904	10	12			South America	Brazil	Rio de Janeiro		Corcovado.	-43.22	-22.88										sheet					<a href="http://sweetgum.nybg.org/science/vh/specimen_details.php?irn=329687" target="other" class="eLink"> <mi>dwc_moreinfo</mi></a>	NY00770598
NYBG	NYBG_BR	770599	Solanum hexandrum	PreservedSpecimen	Plantae	Magnoliophyta		Solanales	Solanaceae	Solanum	hexandrum		Vell.	M. H. Nee	1979	06	26		s.n.		L. Riedel	1832	12				South America	Brazil	Rio de Janeiro														sheet					<a href="http://sweetgum.nybg.org/science/vh/specimen_details.php?irn=329684" target="other" class="eLink"> <mi>dwc_moreinfo</mi></a>	NY00770599
NYBG	NYBG_BR		Solanum hexandrum	PreservedSpecimen	Plantae	Magnoliophyta		Solanales	Solanaceae	Solanum	hexandrum		Vell.						3912		Liene	1958	06	24			South America	Brazil	Rio de Janeiro		Estado da Guanabara, Mesa do Imperador.	-43.257779	-22.970378										sheet						NY
NYBG	NYBG_BR		Solanum hexandrum	PreservedSpecimen	Plantae	Magnoliophyta		Solanales	Solanaceae	Solanum	hexandrum		Vell.	M. H. Nee	2007				1987		P. Fiaschi	2004	02	14			South America	Brazil	Bahia	Jussari	Estrada de Jussari para Palmira, entrada à esq. ca. 7.5 km após Jussari. Fazenda Teimoso. RPPN Serra do Teimoso.	-39.5361	-15.1603										sheet						NY
NYBG	NYBG_BR		Solanum hexandrum	PreservedSpecimen	Plantae	Magnoliophyta		Solanales	Solanaceae	Solanum	hexandrum		Vell.						2076		H. S. Irwin	1958	11	12			South America	Brazil	Minas Gerais	Viçosa		-42.868031	-20.7613428										sheet						NY
NYBG	NYBG_BR		Solanum hexandrum	PreservedSpecimen	Plantae	Magnoliophyta		Solanales	Solanaceae	Solanum	hexandrum		Vell.								P. H. Davis	1976	08	21			South America	Brazil	São Paulo		Serra do Mar above Ubatuba.							50	100				sheet						NY
NYBG	NYBG_BR		Solanum hexandrum	PreservedSpecimen	Plantae	Magnoliophyta		Solanales	Solanaceae	Solanum	hexandrum		Vell.						4118		Y. E. J. Mexia	1929	12	17			South America	Brazil	Minas Gerais	Viçosa		-42.868031	-20.7613428					680	680				sheet						NY
UFMT	UFMT	9905	Solanum hexandrum	S	Plantae				Solanaceae	Solanum	hexandrum		Vell.	Lima-Silva, A.	2018				1501		Macedo, M.; et al.	1980	02	13				Brasil	Mato Grosso	Cáceres	Estrada para Quatro Marcos-Araputanga Km 15			-57.6789016723633	-16.0706005096436	172193												Árvore, flor roxa; Mata de capoeira; solo argilo arenoso
UFRJ	RFA	24468	Solanum hexandrum	Preservedecimen	Plantae				Solanaceae	Solanum	hexandrum		Vell.	C. M. Vieira					84/011		F. M. de B. Pereira	2000	05	12				Brasil	Rio de Janeiro	Sapucaia	3º distrito, Fazenda Selo Verde	-42.849722						758	758									Arbusto com 1,3m de altura, flores lilases, flores verdes e caule bege, comum no local	RFA29698
UFRJ	RFA	24687	Solanum hexandrum	Preservedecimen	Plantae				Solanaceae	Solanum	hexandrum		Vell.	M. Bovini	2001	08	28		45/35		F. de B. Pereira	2000	09	22				Brasil	Rio de Janeiro	Sapucaia	Fazendas Pilatos	-42.825833	-22.051944					480	480									Hábito herbáceo, folhas lilás escuro, flores roxo, comum no local	RFA29695
UFRJ	RFA	25870	Solanum hexandrum	Preservedecimen	Plantae				Solanaceae	Solanum	hexandrum		Vell.	M. Bovini	2001	07	03		23/55		A. Quinet	2000	12	04				Brasil	Rio de Janeiro	Magé	Distrito de Piabetá	-43.123611	-22.570556					300	300									Arbusto, 2,5m de altura, 4cm de DAP, flores verdes-marrom, folha verde discolor, comum no local	RFA29694
UFRJ	RFA	29993	Solanum hexandrum	Preservedecimen	Plantae				Solanaceae	Solanum	hexandrum		Vell.	M. Bovini	2002	02	21		32/140		A. Quinet	2002	01	10				Brasil	Rio de Janeiro	Miguel Pereira	Distrito de Vera Cruz	-43.43	-22.483889					480	480									Arbustiva, 2m de altura, 4cm de DAP, frutos imaturos verdes, flor com cálice verde e corola azul, comum no local	RFA29696
UFRGS	ICN	186716	Solanum hexandrum	S	Plantae	Dicotyledon			Solanaceae	Solanum	hexandrum		Vell.	Stehmann, JR					8250		Sobral, M						América do Sul	Brasil	MG	Marliéria	Parque Estadual do Rio Doce.			-42.7322006225586	-19.7122001647949	28215												Arbusto 2 metros, flores roxas.	ICN00036704
UFOP	OUPR	30205	Solanum hexandrum	PreservedSpecimen	Plantae				Solanaceae	Solanum	hexandrum		Vell.	Condorcet-Aranha	1977	03	25		s.n.		Magalhães-Gomes, C.T.; Magalhães-Gomes, F.	1893	02					Brasil	Minas Gerais	Ouro Preto	Lages			-43.5080986022949	-20.2875003814697	44599												Flôres candidas aromaticas. Planta espinhosa.
UFOP	OUPR	30206	Solanum hexandrum	PreservedSpecimen	Plantae				Solanaceae	Solanum	hexandrum		Vell.	Agra, M.F.	1998				553		Silva, J.	1971	12	09				Brasil	Minas Gerais	Governador Valadares	Estação Experimental de Governador Valadares			-41.9494018554688	-18.8511009216309	50833												Sub-arbusto até 2m. Flôres azuis claras. Pouco frequentes. Alto de morro erodido
UFOP	OUPR	30207	Solanum hexandrum	PreservedSpecimen	Plantae				Solanaceae	Solanum	hexandrum		Vell.	Agra, M.F.	1998				s.n.		Magalhães-Gomes, F.	1894	09	07				Brasil	Rio de Janeiro	Rio de Janeiro	Entre Tijuca e Horto Botânico			-43.2075004577637	-22.9027996063232	57442												Herba fruticora. Fl. magna violacei. In sylvis.
IAC	IAC	18579	Solanum hexandrum	S	Plantae				Solanaceae	Solanum	hexandrum		Vell.	L.L. Giacomin	2011	09	20		s/nº		J. Delistoianov	1960	03	20				Brasil	Espírito Santo		Vale do Rio Doce
IAC	IAC	19793	Solanum hexandrum	S	Plantae				Solanaceae	Solanum	hexandrum		Vell.	L.L. Giacomin	2011	09	20		20		H.F. Leitão Filho	1967	06	20				Brasil	São Paulo	Santo Antônio de Posse		-46.9194	-22.6061															bastante ornamental
IAC	IAC	21895	Solanum hexandrum	S	Plantae				Solanaceae	Solanum	hexandrum		Vell.	L.L. Giacomin	2011	09	10		s/nº		C. Aranha	1969	10	10				Brasil	São Paulo		Litoral Norte
IAC	IAC	22350	Solanum hexandrum	S	Plantae				Solanaceae	Solanum	hexandrum		Vell.	L.L. Giacomin	2011	09	20		s/nº		H.M. Souza	1970	10	20				Brasil	São Paulo	Campinas		-47.0608	-22.9056
IAC	IAC	22993	Solanum hexandrum	S	Plantae				Solanaceae	Solanum	hexandrum		Vell.	L.L. Giacomin	2011	09	06		1379		H.F. Leitão Filho	1972	09	06				Brasil	São Paulo	São Sebastião	margem da estrada para Santos	-45.4097	-23.76
IAC	IAC	22995	Solanum hexandrum	S	Plantae				Solanaceae	Solanum	hexandrum		Vell.	L.L. Giacomin	2011	09	05		1373		H.F. Leitão Filho	1972	09	05				Brasil	São Paulo	Ubatuba	estrada para praia de Itamanbuca	-45.0711	-23.4339
IAC	IAC	31694	Solanum hexandrum	S	Plantae				Solanaceae	Solanum	hexandrum		Vell.	L.L. Giacomin	2011	09	02		3116		L.S. Leoni & C.C. Berg	1995	11	02				Brasil	Minas Gerais	Carangola	Serra da dirfenga	-42.0294	-20.7331
IAC	IAC	47295	Solanum hexandrum	S	Plantae				Solanaceae	Solanum	hexandrum		Vell.	J.R. Stehmann & L.L. Giacomin	2011	09	02		1119		R. Tsuji; L.C. Bernacci & E.F. Souto	2006	03	02				Brasil	Minas Gerais	Leopoldina	proximidades da cidade	-42.506667	-21.418639															Coordenadas do material: 42°30#?#24"W, 21°25#?#07.1"S
IAC	IAC	48023	Solanum hexandrum	S	Plantae				Solanaceae	Solanum	hexandrum		Vell.	J.R. Stehmann & L.L. Giacomin	2011	09	02		40		C.F. Nardin; J.A.M.A. Gomes & L.C. Bernacci	2007	09	02				Brasil	São Paulo	Ubatuba	IAC, Estação Experimental (Horto), estrada da bica, lado esquerdo, próximo a bica	-45.0711	-23.4339
UFMG	BHCB	123118	Solanum hexandrum	PreservedSpecimen	Plantae	Dicotyledon			Solanaceae	Solanum	hexandrum		Vell.		2018	03			7515		Krieger, L	1969	10				Southern America	Brasil	Minas Gerais	Juiz de Fora				-43.3502998352051	-21.7642002105713	36144												Arbusto alto, fl. roxas.	BHCB046749
UFMG	BHCB	19353	Solanum hexandrum	PreservedSpecimen	Plantae	Dicotyledon			Solanaceae	Solanum	hexandrum		Vell.						s.n.		Tolêdo, F; Stehmann, JR						Southern America	Brasil	Minas Gerais	Caratinga				-42.1391983032227	-19.7896995544434	49886
UFMG	BHCB	102605	Solanum hexandrum	PreservedSpecimen	Plantae	Dicotyledon			Solanaceae	Solanum	hexandrum		Vell.		2018	03			1987		Fiaschi, P; Amorim, A; Paixão, JL; Sant'Ana, SC de	2004	02	14			Southern America	Brasil	Bahia	Jussari	RPPN Serra do Teimoso, Estrada de Jurassi para Palmira, entrada à esq. Ca. 7,5km após Jurassi. Fazenda Teimoso.	-39.536111	-15.160278															Arbusto com ramos decumbentes, ca. 2m alt. Folhas levemente discolores. Flores com cálice verde-claro, corola roxo claro, estames com anteras amarelas.	BHCB046732
UFMG	BHCB	109083	Solanum hexandrum	PreservedSpecimen	Plantae	Dicotyledon			Solanaceae	Solanum	hexandrum		Vell.		2018	03			s.n.		Viana, LCS; Maciel, GM	2006	03				Southern America	Brasil	Minas Gerais	Lima Duarte	Parque Estadual do Ibitipoca			-43.793098449707	-21.8425006866455	30417												Altura 2m.	BHCB046751
UFMG	BHCB	117031	Solanum hexandrum	PreservedSpecimen	Plantae	Dicotyledon			Solanaceae	Solanum	hexandrum		Vell.		2018	03			625		Lucas, EJ; Mazine, FF; Brummitt, NA; Campos, OR; Flores, TB; Jennings, LVS; Sampaio, D	2006	11	21			Southern America	Brasil	Rio de Janeiro	Teresópolis	Parque Nacional da Serra dos Órgãos, Trilha Mozart-Catão	-42.983333	-22.45					1100	1100									Material coletado em sílica.; Erva de 1,5m de altura, cálice e corola liliáces.; Floresta ombrófila densa alto-montana.	BHCB046722
UFMG	BHCB	11890	Solanum hexandrum	PreservedSpecimen	Plantae	Dicotyledon			Solanaceae	Solanum	hexandrum		Vell.		2018	03			13395		Krieger, PL	1974	11	03			Southern America	Brasil	Espírito Santo	Venda Nova do Imigrante				-41.1347007751465	-20.3397006988525	15909												Arbusto alto (3-4m). Flores roxas, grandes, folhas grandes, espinhosas, muito delicadas (rasgam). Frequente.; Na mata, em clareiras.	BHCB046724
UFMG	BHCB	12010	Solanum hexandrum	PreservedSpecimen	Plantae	Dicotyledon			Solanaceae	Solanum	hexandrum		Vell.		2018	03			199		Costa L.V.; Horta, MB; et al.	1987	11	27			Southern America	Brasil	Minas Gerais	Caratinga	Estação Biológica de Caratinga			-42.1391983032227	-19.7896995544434	49886												Arbusto 1,5m (moita). Pétalas roxas, muitos espinhos, presença de mamangava.; Mata Atlântica	BHCB043406
UFMG	BHCB	12011	Solanum hexandrum	PreservedSpecimen	Plantae	Dicotyledon			Solanaceae	Solanum	hexandrum		Vell.						s.n.		Andrade, IR; Costa, LV; Horta, MB						Southern America	Brasil	Minas Gerais	Caratinga	Estação Biológica de Caratinga			-42.1391983032227	-19.7896995544434	49886
UFMG	BHCB	128457	Solanum hexandrum	PreservedSpecimen	Plantae	Dicotyledon			Solanaceae	Solanum	hexandrum		Vell.		2018	03			69108		Ferreira, LA; Hatschbach, GM; Silva, JM	1999	05	17			Southern America	Brasil	Espírito Santo	Venda Nova do Imigrante	Varzeão			-41.1347007751465	-20.3397006988525	15909		900	900									Arbusto, 2m, flor lilás.; Clareiras da floresta atlântica.	BHCB046740
UFMG	BHCB	128471	Solanum hexandrum	PreservedSpecimen	Plantae	Dicotyledon			Solanaceae	Solanum	hexandrum		Vell.		2018	03			1727		Mello-Silva, R de; Pirani, JR; Cordeiro, I; Assis, MC; Marcato, AC	1999	10	15			Southern America	Brasil	São Paulo	Ubatuba	Trilha para a Praia do Sul, Ilha Anchieta.			-45.0699996948242	-23.4300003051758	34265												Arbusto ca. 2m de altura. Pétalas roxo-claras e estames amarelos.; Mata tropical atlântica.	BHCB046741
UFMG	BHCB	128569	Solanum hexandrum	PreservedSpecimen	Plantae	Dicotyledon			Solanaceae	Solanum	hexandrum		Vell.		2018	03			48677		Silva, JM; Hatschbach, GM	1984	12	06			Southern America	Brasil	Espírito Santo	Domingos Martins	Rodovia BR 262, Próximo a entrada para Domingos Martins.			-40.6591987609863	-20.3633003234863	48150												Arbusto, 1,5m. Flor lilás, anteras amarelas.; Na base de paredões rochosos.	BHCB046715
UFMG	BHCB	128617	Solanum hexandrum	PreservedSpecimen	Plantae	Dicotyledon			Solanaceae	Solanum	hexandrum		Vell.		2018	03			5125		Forzza, RC; Menini Neto, L; Saavedra, MM	2008	05	27			Southern America	Brasil	Rio de Janeiro	Campos dos Goytacases	Ibitioca, Morro do Itaoca.	-41.457222	-21.788333					54	54									Arbusto 1m alt. Flores roxas. Frutos alvos.; Inselbergue com fragmentos de floresta na base.	BHCB046748
UFMG	BHCB	129454	Solanum hexandrum	PreservedSpecimen	Plantae	Dicotyledon			Solanaceae	Solanum	hexandrum		Vell.		2018	03			4944		Demuner, V; Cruz, TA; Belisário, M	2008	01	29			Southern America	Brasil	Espírito Santo	Sanata Leopoldina	Fazenda Caioaba, Propriedade Cláudio Villoni	-40.473056	-20.059389					100	300									Arbusto 1m, botões florais, flores pétalas lilás, cálice vinho.; Interior de mata, beira de riacho.	BHCB043404
UFMG	BHCB	136458	Solanum hexandrum	PreservedSpecimen	Plantae	Dicotyledon			Solanaceae	Solanum	hexandrum		Vell.		2018	03			531		Bünger, MO; Fernandes, AC; Silva, MH; Ribeiro, ASS	2010	03	11			Southern America	Brasil	Minas Gerais	Alto Caparaó	Parque Nacional do Caparaó, Mata na base do Coração.	-41.846806	-20.432111					1356	1356										BHCB046731
UFMG	BHCB	137613	Solanum hexandrum	PreservedSpecimen	Plantae	Dicotyledon			Solanaceae	Solanum	hexandrum		Vell.		2018	03			2012		Fraga, CN; Goldenberg, R; Saavedra, MM; Mynssen, C	2008	05	03			Southern America	Brasil	Espírito Santo	Castelo	Parque Estadual do Forno Grande, Localidade do Rio Manso.			-41.184700012207	-20.6035995483398	23588		1200	1250									Arbusto, ca. 2m. Flores com pétalas brancas, estames amarelos.; Floresta Ombrófila Densa Altomontana.	BHCB046737
UFMG	BHCB	137614	Solanum hexandrum	PreservedSpecimen	Plantae	Dicotyledon			Solanaceae	Solanum	hexandrum		Vell.		2018	03			7124		Amorim, AMA; Forzza, RC; Fraga, CN; Kollmann, L; Labiak, PH	2008	02	16			Southern America	Brasil	Espírito Santo	Cariacica	Reserva Biológica de Duas Bocas, Floresta na beira da estrada para a localidade de Alegre.	-40.481944	-20.3025					500	500									Material prensado em álcool.; Sub-arbusto ca. 1,5m alt. Corola Violácea, estames amarelos.; Floresta Ombrófila Densa Montana.	BHCB046712
UFMG	BHCB	139457	Solanum hexandrum	PreservedSpecimen	Plantae	Dicotyledon			Solanaceae	Solanum	hexandrum		Vell.		2018	03			865		Costa, LV; Sanglard, J	2010	01	12			Southern America	Brasil	Minas Gerais	Volta Grande	PCH Foz do Angú			-42.5388984680176	-21.7705993652344	11543												Arbusto.; Pasto sujo.	BHCB046717
UFMG	BHCB	143467	Solanum hexandrum	PreservedSpecimen	Plantae	Dicotyledon			Solanaceae	Solanum	hexandrum		Vell.		2018	03			641		Souza, JP; Souza, VC de	1996	07	26			Southern America	Brasil	Rio de Janeiro	Santa Maria Madalena	Base do Morro Dubois, beira de mata.			-42.0080986022949	-21.9552993774414	30526												Erva; 0,5 m de altura; botões roxos.	BHCB016103
UFMG	BHCB	144987	Solanum hexandrum	PreservedSpecimen	Plantae	Dicotyledon			Solanaceae	Solanum	hexandrum		Vell.		2018	03			875		Giacomin, LL; Viana, PL; Mota, NFO	2009	04	09			Southern America	Brasil	São Paulo	Bananal	Estação Ecológica de Bananal, Margens da estrada que dá acesso a Estação.			-44.3199996948242	-22.6800003051758	26795												Arbusto escandente. Cálice verde com lacínios lilases. Corola branca a lilás.	BHCB046710
UFMG	BHCB	147134	Solanum hexandrum	PreservedSpecimen	Plantae	Dicotyledon			Solanaceae	Solanum	hexandrum		Vell.		2018	03			298		Machado, TM; Forzza, RC; Stehmann, JR; Amorim, AMA	2010	11	01			Southern America	Brasil	Minas Gerais	Alto Caparaó	Parque Nacional do Caparaó, Estrada para macieira.	-41.816667	-20.483333					1642	1642									Arbusto 1 m. Folhas discolores, pedicelo verde a roxo, flores roxas, fruto verde claro.	BHCB046721
UFMG	BHCB	151143	Solanum hexandrum	PreservedSpecimen	Plantae	Dicotyledon			Solanaceae	Solanum	hexandrum		Vell.		2018	03			7346		Leoni, LS	2009	01	25			Southern America	Brasil	Minas Gerais	Carangola	Fazenda Kamil, Ao lado da estrada			-42.0293998718262	-20.7331008911133	21913												fotografada; Subarbusto, ca. 80cm a 1,3m de altura; caule e ramos aculeados; corola de coloração lilás;	BHCB002669
UFMG	BHCB	152772	Solanum hexandrum	PreservedSpecimen	Plantae	Dicotyledon			Solanaceae	Solanum	hexandrum		Vell.		2018	03			7359		Agra, MF; Bohs, LA; Giacomin, LL; Giudicelli, GC; Jorge, TB	2011	05	02			Southern America	Brasil	São Paulo	São José do Barreiro	Parque Nacional Serra da Bocaina, Road from park administrative headquarters at São José do Barreiro to alojamento at entrance to park	-44.633056	-22.684444					1323	1323									Prensado em álcool.; Roadside, in shade. Single-trunked shrub 1-2m tall. Collas light purple; anthers yellow; flowers 6-merous. Fruits light green, hanging, surrounded by the purplish accrescent calyx.	BHCB002583
UFMG	BHCB	154151	Solanum hexandrum	PreservedSpecimen	Plantae	Dicotyledon			Solanaceae	Solanum	hexandrum		Vell.		2018	03			1689		Giacomin, LL; Almeida, TE	2012	01	25			Southern America	Brasil	São Paulo	Ubatuba	Parque Estadual da Serra do Mar, Núcleo Picinguaba, Trilha do Corisco. Cerca de 2km após a Casa da Farinha (sentido Picinguaba-Paraty)	-44.834194	-23.336583					59	59									Prensado em álcool.; Arbusto, 1m. Pétalas roxas, estames amarelos.; Crescendo em clareira de floresta ombrófila densa, próximo a rio.	BHCB046727
UFMG	BHCB	19353	Solanum hexandrum	PreservedSpecimen	Plantae	Dicotyledon			Solanaceae	Solanum	hexandrum		Vell.		1997	06	18		s.n.		Stehmann, JR; Soares, ME	1991	08	22			Southern America	Brasil	Minas Gerais	Caratinga	Ipaba. Fazenda Macedônia/Cenibra			-42.1391983032227	-19.7896995544434	49886												Corola violacea	BHCB050754
UFMG	BHCB	158574	Solanum hexandrum	PreservedSpecimen	Plantae	Dicotyledon			Solanaceae	Solanum	hexandrum		Vell.		2018	03			1827		Giacomin, LL; Bohs, LA; Gouvêa, YF	2012	06	02			Southern America	Brasil	Rio de Janeiro	Santa Maria Madalena	Estrada de subida para o Mirante da Torre (morro d, área degradada limítrofe à plantação de Eucalyptus spp.; margem de estrada não pavimentada	-42.031611	-21.978361					745	745									Arbusto ereto, 3 m. Flores com pétalas roxas, estames amarelos. Frutos imaturos alvos.	BHCB046714
UFMG	BHCB	158580	Solanum hexandrum	PreservedSpecimen	Plantae	Dicotyledon			Solanaceae	Solanum	hexandrum		Vell.		2018	03			1833		Giacomin, LL; Bohs, LA; Gouvêa, YF	2012	06	03			Southern America	Brasil	Rio de Janeiro	Varre-Sai	Estrada que liga Natividade a Varre-Sai, fragmento de floresta ciliar isolado numa matriz de pastagem, marginal à estrada; ca. 5 km SW (antes) de Varre-Sai	-41.916667	-20.994417					310	310									Arbusto ereto, 3 m, crescendo à sombra. Flores com pétalas roxas, cálice verde, fortemente acrescente. Frutos alvos, 1-2 cm diam.	BHCB046729
UFMG	BHCB	158591	Solanum hexandrum	PreservedSpecimen	Plantae	Dicotyledon			Solanaceae	Solanum	hexandrum		Vell.		2018	03			1844		Giacomin, LL; Bohs, LA; Gouvêa, YF	2012	06	05			Southern America	Brasil	Espírito Santo	Atílio Vivacqua	Estrada não pavimentada que leva à comunidade de M, área antropizada (pastagem), com afloramentos graníticos, marginal à estrada	-41.204111	-21.002333					435	435									Arbusto, 1 m, crescendo ao sol. Corola roxa, anteras amarelas. Frutos alvos, globosos, 2,5 cm diam. completamente recoberto pelo cálice roxo.	BHCB046725
UFMG	BHCB	168892	Solanum hexandrum	PreservedSpecimen	Plantae	Dicotyledon			Solanaceae	Solanum	hexandrum		Vell.		2018	03			4535		Pereira, FB	2000	09	22			Southern America	Brasil	Rio de Janeiro	Sapucaia	Fazenda Pilatos	-42.825833	-22.051944					480	480									Comum no local.; Herbácea; folhas lilás escuro; flores roxo.; Capoeira/pasto sobre solo argiloso; Luminosidade intensa.	BHCB014238
UFMG	BHCB	170600	Solanum hexandrum	PreservedSpecimen	Plantae	Dicotyledon			Solanaceae	Solanum	hexandrum		Vell.		2018	03			1446		Arbocz, GF	1996	05	13			Southern America	Brasil	São Paulo	Piquete	Margem da rodovia para Itajubí			-45.1699981689453	-22.6100006103516	13434		1600	1600									Arbusto, ca. 1,5 m de altura. Flores ausentes. Frutos imaturos verdes.	BHCB015268
UFMG	BHCB	170608	Solanum hexandrum	PreservedSpecimen	Plantae	Dicotyledon			Solanaceae	Solanum	hexandrum		Vell.		2018	03			1119		Tsuji, R; Bernacci, LC; Franco, E	2006	03	02			Southern America	Brasil	Minas Gerais	Leopoldina	Proximidades da cidade	-42.506667	-21.418639					150	150									Prensado em alcool, comum.; Arbusto, ca. 2,0 m de altura. Flores ausentes. Frutos vináceos.	BHCB015276
UFMG	BHCB	17220	Solanum hexandrum	PreservedSpecimen	Plantae	Dicotyledon			Solanaceae	Solanum	hexandrum		Vell.		2018	03			55		Campos, WG	1986	02	10			Southern America	Brasil	Minas Gerais	Dionísio	Cia. Agrícola e Florestal Santa Bárbara, CEMAS			-42.7766990661621	-19.8428001403809	31394													BHCB046723
UFMG	BHCB	17349	Solanum hexandrum	PreservedSpecimen	Plantae	Dicotyledon			Solanaceae	Solanum	hexandrum		Vell.		2018	03			s.n.		Grandi, TSM; Braga, MMN	1989	06	04			Southern America	Brasil	Minas Gerais	Bom Jardim	Serra do Pacau, entre Bom Jardim e Sta. Rita.																	Arbustivo 2m.; Mata Atlântica.	BHCB046752
UFMG	BHCB	174144	Solanum hexandrum	PreservedSpecimen	Plantae	Dicotyledon			Solanaceae	Solanum	hexandrum		Vell.		2018	03			137		Gouvêa, YF; Falcão, BF	2014	09	12			Southern America	Brasil	Rio de Janeiro	Santa Maria Madalena	RJ - 159, Estrada que liga Santa Maria Madalena a Alto Imbé . Beira de estrada	-41.971389	-21.993056					452	452									Arbusto ca. 2,0m. Corola púrpura. Cálice, pedicelo e pedúnculo vináceos. Anteras amarelas; Próximo a afloramento rochoso	BHCB046742
UFMG	BHCB	174146	Solanum hexandrum	PreservedSpecimen	Plantae	Dicotyledon			Solanaceae	Solanum	hexandrum		Vell.		2018	03			135		Gouvêa, YF; Falcão, BF	2014	09	13			Southern America	Brasil	Rio de Janeiro	Ibitioca	BR - 101, Crescendo em pasto. A margem da rodovia.	-41.459167	-21.821111					45	45									Arbusto ca. 1, 8m. Corola, cálice, pedicelo e pedúnculo púrpura. Anteras amarelas; Próximo a pequeno fragmento de mata na base de afloramento rochoso (Pedra Negra)	BHCB046719
UFMG	BHCB	176406	Solanum hexandrum	PreservedSpecimen	Plantae	Dicotyledon			Solanaceae	Solanum	hexandrum		Vell.		2018	03			158		Gouvêa, YF; Stehmann, JR	2015	04	27			Southern America	Brasil	Espírito Santo	Venda Nova do Imigrante	BR - 262, À magrem da BR. Subindo rua de calçamento.	-41.085778	-20.354333					979	979									Arbusto ca. 1,6 m. Pétalas e cálice púrpuras. Anteras amarelas; Fragmento de Floresta Ombrófila Densa. Vegetação de borda	BHCB046711
UFMG	BHCB	176407	Solanum hexandrum	PreservedSpecimen	Plantae	Dicotyledon			Solanaceae	Solanum	hexandrum		Vell.		2018	03			159		Gouvêa, YF; Stehmann, JR	2015	04	27			Southern America	Brasil	Espírito Santo	Venda Nova do Imigrante	BR - 262, À magrem da BR. Subindo rua de calçamento.	-41.085778	-20.354333					979	979									Arbusto ca. 1,7 m. Pétalas e cálice púrpuras. Anteras amarelas; Fragmento de Floresta Ombrófila Densa. Vegetação de borda	BHCB046730
UFMG	BHCB	192016	Solanum hexandrum	PreservedSpecimen	Plantae	Dicotyledon			Solanaceae	Solanum	hexandrum		Vell.		2018	10			1966		Santos, MCF dos; Moura, R; Carvalho, LJS; Malafaia, AGC	2006	09	20			Southern America	Brasil	Rio de Janeiro	Rio de Janeiro	Parque Estadual do Mendanha, Estrada de Furnas, entre as torres de retransmissão e o sítio da rampa de vôo livre, lado direito.	-43.534444	-22.831389															Árvore com cerca de 6,0m de altura, heliófila, folhas cartáceas discolores verdes, botões florais de cor alvo-esverdeada e lilás, flores com cálice roxo, corola lilás, anteras amarelas, estigma verde e estilete alvo. Flores abertas vo	BHCB192016
UFMG	BHCB	192017	Solanum hexandrum	PreservedSpecimen	Plantae	Dicotyledon			Solanaceae	Solanum	hexandrum		Vell.		2018	10			1111		Jascone, CES; Cruz-Oliveira, B	2008	08	22			Southern America	Brasil	Rio de Janeiro	Rio de Janeiro	Campo Grande, Parque Natural Municipal da Serra do Mendanha , Rio Pecador.			-43.2075004577637	-22.9027996063232	57442												Arbusto com cerca de 2,0m de altura, heliófilo, rupícola em local úmido dentro do rio, flores com cálice e corola roxos, presença de botões alvos-arroxeados e formando frutos alvos.; Mata Atlântica, Floresta Ombrófila Densa Submontana	BHCB192017
UFMG	BHCB	19352	Solanum hexandrum	PreservedSpecimen	Plantae	Dicotyledon			Solanaceae	Solanum	hexandrum		Vell.		2018	03			s.n.		Stehmann, JR; Soares, ME	1991	08	22			Southern America	Brasil	Minas Gerais	Caratinga	Fazenda Macedônia - CENIBRA-Ipaba.			-42.1391983032227	-19.7896995544434	49886												Pêlos dourados, flores violáceas; Capoeira; Arbustivo	BHCB046713
UFMG	BHCB	199834	Solanum hexandrum	PreservedSpecimen	Plantae	Dicotyledon			Solanaceae	Solanum	hexandrum		Vell.		2017				2795		Nadruz, M; Gonçalvez, I	2013	12	17			Southern America	Brasil	Rio de Janeiro	Cardoso Moreira	Serra da Bandeira			-41.6156005859375	-21.4883003234863	24769												Presença de espinhos; lâmina membranácea discolor; pedúnculo e pedicelo esverdeados; cálice esverdeado, corola esbarnquiçada e estames amarelados; subarbusto; habitat mata seca; Floresta secundária preservada; Mata Estacional Semideci	BHCB199834
UFMG	BHCB	20837	Solanum hexandrum	PreservedSpecimen	Plantae	Dicotyledon			Solanaceae	Solanum	hexandrum		Vell.		2018	03			s.n.		Stehmann, JR	1992	10	30			Southern America	Brasil	Minas Gerais	Marliéria	PFE Rio Doce			-42.7322006225586	-19.7122001647949	28215												Herbáceo.; Mata.	BHCB046726
UFMG	BHCB	20864	Solanum hexandrum	PreservedSpecimen	Plantae	Dicotyledon			Solanaceae	Solanum	hexandrum		Vell.		2018	03			s.n.		Stehmann, JR; Arantes, AA	1992	10	31			Southern America	Brasil	Minas Gerais	Marliéria	Parque Estadual do Rio Doce			-42.7322006225586	-19.7122001647949	28215												Mata.	BHCB046728
UFMG	BHCB	32817	Solanum hexandrum	PreservedSpecimen	Plantae	Dicotyledon			Solanaceae	Solanum	hexandrum		Vell.		2018	03			1280		Lombardi, JA	1996	07	16			Southern America	Brasil	Minas Gerais	Marliéria	Parque Estadual do Rio Doce, Perto do alojamento			-42.7322006225586	-19.7122001647949	28215												Arbusto, ca. 1.8m. Folhas herbáceas, cálice verde, corola roxa, estames amarelos, frutos imaturos brancos de cálice arroxeado.; Capoeira.	BHCB046720
UFMG	BHCB	33823	Solanum hexandrum	PreservedSpecimen	Plantae	Dicotyledon			Solanaceae	Solanum	hexandrum		Vell.		2018	03			147		Andrade, IR; Costa, LV	1987	07	07			Southern America	Brasil	Minas Gerais	Caratinga	Estação Biológica de Caratinga			-42.1391983032227	-19.7896995544434	49886												Sub-arbusto. Corola roxa, muito espinhosa.; Mata Atlântica.	BHCB046753
UFMG	BHCB	35250	Solanum hexandrum	PreservedSpecimen	Plantae	Dicotyledon			Solanaceae	Solanum	hexandrum		Vell.		2018	03			1445		Furlan, A; Assis, MA de; Garcia, FCP; Ruffino, PHP; Carneiro, CE	1994	04	15			Southern America	Brasil	São Paulo	Ubatuba	Trilha da Almada, Km 13 da Rodovia Rio/Santos.			-45.0699996948242	-23.4300003051758	34265												Arbusto até 3m alt. Flores roxo-claro.; Mata Atlântica.	BHCB046734
UFMG	BHCB	38999	Solanum hexandrum	PreservedSpecimen	Plantae	Dicotyledon			Solanaceae	Solanum	hexandrum		Vell.		2018	03			3513		Salino, A	1997	09	29			Southern America	Brasil	Minas Gerais	Jequeri	Usina de Providência			-42.6657981872559	-20.4557991027832	22280												Arbusto ca. de 2.3m de altura, flores lilás com estames amarelos, cálice espinescente e ferrugíneo e levemente inflado.	BHCB043408
UFMG	BHCB	41930	Solanum hexandrum	PreservedSpecimen	Plantae	Dicotyledon			Solanaceae	Solanum	hexandrum		Vell.		2018	03			s.n.		Costa, LV	1998	01				Southern America	Brasil	Minas Gerais	Itamarati de Minas	Mineração de Alumínio - CBA, Itamarati de Minas/São João Nepomuceno-MG			-42.817798614502	-21.4158000946045	10054												Arbusto 1,5m.; Floresta estacional semidecídual.	BHCB043407
UFMG	BHCB	43039	Solanum hexandrum	PreservedSpecimen	Plantae	Dicotyledon			Solanaceae	Solanum	hexandrum		Vell.		2018	03			2388		Lombardi, JA; Gonçalves, M; Temponi, LG	1998	09	06			Southern America	Brasil	Minas Gerais	Caratinga	Estação Biológica de Caratinga, Fazenda Montes Cla, Próximo ao Alojamento.	-41.817222	-19.731389															Arbusto, ca. 2.0 m. Folhas papiráceas, cálice e corola lilás, estames amarelos.; Mata Atlântica, área alagada na beira de córrego.	BHCB046736
UFMG	BHCB	48097	Solanum hexandrum	PreservedSpecimen	Plantae	Dicotyledon			Solanaceae	Solanum	hexandrum		Vell.		2018	03			3120		Lombardi, JA	1999	07	10			Southern America	Brasil	Minas Gerais	Fervedouro	Parque Estadual da Serra do Brigadeiro	-42.485833	-20.716111					1400	1400									Arbusto, ca. 1.0m. Folhas papiráceas, cálice verde-arroxeado, corola lilás, anteras amarelas.; Mata Atlântica em diversos graus de perturbação.	BHCB046718
UFMG	BHCB	49215	Solanum hexandrum	PreservedSpecimen	Plantae	Dicotyledon			Solanaceae	Solanum	hexandrum		Vell.		2018	03			s.n.		Costa L.V.	1999	06				Southern America	Brasil	Minas Gerais	Nova Era	RPPN Guilman-Amorim., Antônio Dias.			-43.0374984741211	-19.75	21093												Arbusto-2,5 m.; Clareira eucaliptal.	BHCB046750
UFMG	BHCB	49472	Solanum hexandrum	PreservedSpecimen	Plantae	Dicotyledon			Solanaceae	Solanum	hexandrum		Vell.		2018	03			s.n.		Chuang, W	1990	10	20			Southern America	Brasil	São Paulo	Mogi das Cruzes	Serra do Itapety, Sítio Cachoeirinha- Bairro Alto da Serra.			-46.1883010864258	-23.5228004455566	28666												Porte arbóreo, cerca de 3m de altura.	BHCB046745
UFMG	BHCB	51028	Solanum hexandrum	PreservedSpecimen	Plantae	Dicotyledon			Solanaceae	Solanum	hexandrum		Vell.		2018	03			587		Freitas, L	1999	02	24			Southern America	Brasil	São Paulo	São José do Barreiro	Rodóvia SP 221, Km 13.			-44.5699996948242	-22.6399993896484	30784												Arbusto/ca. 1.5 m. Corola púrpura violáceo com anteras amarelo e púrpura.; Floresta Ombrófila Densa Altomontana.	BHCB046738
UFMG	BHCB	57007	Solanum hexandrum	PreservedSpecimen	Plantae	Dicotyledon			Solanaceae	Solanum	hexandrum		Vell.		2018	03			5885		Salino, A; Melo, LCN	2000	11	14			Southern America	Brasil	Minas Gerais	Santa Rita de Jacutinga	Usina Hidrelétrica Henrique Portugal. Rio Bananal, Rio Bananal.			-44.0950012207031	-22.1494007110596	20148												Arbusto com 1,5m de altura, flores lilás com estames amarelos, frutos imaturos verdes.; Interior de mata.	BHCB046747
UFMG	BHCB	57883	Solanum hexandrum	PreservedSpecimen	Plantae	Dicotyledon			Solanaceae	Solanum	hexandrum		Vell.		2018	03			160		Arbocz, GF	1994	02	22			Southern America	Brasil	São Paulo	Piquete	Alto da Serra da Mantiqueira, à margem da rod. BR-459.			-45.1699981689453	-22.6100006103516	13434		1200	1400									Arbusto com espinhos, frutos verde rajados.	BHCB046743
UFMG	BHCB	68278	Solanum hexandrum	PreservedSpecimen	Plantae	Dicotyledon			Solanaceae	Solanum	hexandrum		Vell.						1403		Mota, RC da	2001	12	12			Southern America	Brasil	Minas Gerais	Frei Inocêncio	Rio Suaçuí Grande	-47.990689	-18.699525															S. hexandrum, pode ser híbrido com S. polytrichum.; Flores roxas e estames amarelos.; Planta coletada em mata secundária; subarbustivo;	BHCB046788
UFMG	BHCB	71058	Solanum hexandrum	PreservedSpecimen	Plantae	Dicotyledon			Solanaceae	Solanum	hexandrum		Vell.		2018	03			46667		Hatschbach, GM	1983	08	03			Southern America	Brasil	Minas Gerais	Muriaé	Rod. BR-116.			-42.3664016723633	-21.1305999755859	32715												Arbusto, 2m, flor azul, cálice vinoso.; Paredões rochosos.	BHCB043403
UFMG	BHCB	76880	Solanum hexandrum	PreservedSpecimen	Plantae	Dicotyledon			Solanaceae	Solanum	hexandrum		Vell.		2018	03			s.n.		Costa, AS; Viegas, AP	1938	09	27			Southern America	Brasil	São Paulo	Ubatuba	Estação Experimental Ubatuba			-45.0699996948242	-23.4300003051758	34265												Arbusto	BHCB027224
UFMG	BHCB	76919	Solanum hexandrum	PreservedSpecimen	Plantae	Dicotyledon			Solanaceae	Solanum	hexandrum		Vell.		2018	03			1379		Leitão Filho, HF	1972	09	06			Southern America	Brasil	São Paulo	São Sebastião	Às margens da rodovia para Santos			-45.4099998474121	-23.7600002288818	41977												Herbáceo até 60cm; flores lilaz-escuro; grandes e ornamentais.; Nativo em mata secundária.	BHCB046744
UFMG	BHCB	76920	Solanum hexandrum	PreservedSpecimen	Plantae	Dicotyledon			Solanaceae	Solanum	hexandrum		Vell.		2018	03			1373		Leitão Filho, HF	1972	09	05			Southern America	Brasil	São Paulo	Ubatuba	Praia de Itamambuca			-45.0699996948242	-23.4300003051758	34265												Subarbusto até 0,6m, flores lilases bem escuras. Fruto envolvido quase que totalmente pelo cálice; Nativo à beira de estrada	BHCB027225
UFMG	BHCB	76932	Solanum hexandrum	PreservedSpecimen	Plantae	Dicotyledon			Solanaceae	Solanum	hexandrum		Vell.		2018	03			s.n.		Condorcet Aranha	1969	10	10			Southern America	Brasil	São Paulo		Litoral Norte																	Arbusto de flores azuladas	BHCB027226
UFMG	BHCB	78057	Solanum hexandrum	PreservedSpecimen	Plantae	Dicotyledon			Solanaceae	Solanum	hexandrum		Vell.		2018	03			5076		Lombardi, JA; Salino, A; Mota, RC da; Carvalho, FA	2003	02	19			Southern America	Brasil	Minas Gerais	Salto da Divisa	Fazenda Santana	-40.030722	-16.058278					183	212									Arbusto, ca. 0.3 m, folhas papiráceas, botões avermelhados.; Mata secundária e borda.	BHCB046716
UFMG	BHCB	81857	Solanum hexandrum	PreservedSpecimen	Plantae	Dicotyledon			Solanaceae	Solanum	hexandrum		Vell.		2018	03			348		França, GS	2003	06	04			Southern America	Brasil	Minas Gerais	Marliéria	Fazenda Paraíso			-42.7322006225586	-19.7122001647949	28215		336	336									Arbusto- 4m, flores arroxeadas.; Margem de córrego, floresta estacional semidecidual.	BHCB046733
UFMG	BHCB	82623	Solanum hexandrum	PreservedSpecimen	Plantae	Dicotyledon			Solanaceae	Solanum	hexandrum		Vell.		2018	03			5326		Lombardi, JA; Stehmann, JR; Mota, RC da; Temponi, LG	2003	08	21			Southern America	Brasil	Minas Gerais	Salto da Divisa	Fazenda Santana	-40.033194	-16.05575					199	199									Prensado em álcool.; Arbusto, ca. 0.3 m, folhas papiráceas, flores lilases.; Borda de mata decídua, alterada.	BHCB046739
UFMG	BHCB	87640	Solanum hexandrum	PreservedSpecimen	Plantae	Dicotyledon			Solanaceae	Solanum	hexandrum		Vell.		2018	03			239		Vimercat, JM	1984	10	25			Southern America	Brasil	Espírito Santo	Santa Leopoldina	Rio da Prata			-40.5297012329102	-20.1005992889404	23799		500	500									Arbusto de 1,5m, flores roxas.; Solo úmido.	BHCB046746
UFMG	BHCB	87998	Solanum hexandrum	PreservedSpecimen	Plantae	Dicotyledon			Solanaceae	Solanum	hexandrum		Vell.		2018	03			548		França, GS; Raggi, F	2004	05	05			Southern America	Brasil	Minas Gerais	Timóteo	Parque Estadual do Rio Doce	-42.568611	-19.591111					248	248									Macuco; Arbusto - 1,5m, flor arroxeada, borda de mata.	BHCB046735
UNIOESTE	UNOP	8375	Solanum hexandrum	S	Plantae				Solanaceae	Solanum	hexandrum		Vell.	Giacomin, L.L.	2011	09			8215		Lombardi, J.A.; Taxonomia de campo 2011; Taxonomia de campo 2011	2011	04	14				Brasil	Rio de Janeiro	Teresópolis	Parque Nacional da Serra dos Órgãos, trilha suspensa.	-42.995297	-22.425556					1190	1190									Mata atlântica. Arbusto ca. 1,5 m, flores lilases, anteras amarelas, cálice acrescente amarelado, frutos maduros brancos.
UFJF	CESJ	30574	Solanum hexandrum	PreservedSpecimen	Plantae	Angiosperma			Solanaceae	Solanum	hexandrum		Vell.	L.L. Giocomis	2009	05			s.n.		F.R.G. Salimena; R.G. Silveira; C.A.N. Ribeiro	1996	10	05			América do Sul	Brasil	Minas Gerais	Rio Preto	UHE de Mello			-43.8278007507324	-22.0891990661621	20815												Área de influência, próximo as parcelas de fitossociologia.	CESJ030574
UFJF	CESJ	1073	Solanum hexandrum	PreservedSpecimen	Plantae	Angiosperma			Solanaceae	Solanum	hexandrum		Vell.	E.A. Feliciano	2007	11	26		s.n.		L. Roth	1953	02	10			América do Sul	Brasil	Minas Gerais	Juiz de Fora				-43.3502998352051	-21.7642002105713	36144												Arbustozinho, flores roxas.	CESJ001073
UFJF	CESJ	14937	Solanum hexandrum	PreservedSpecimen	Plantae	Angiosperma			Solanaceae	Solanum	hexandrum		Vell.	R.C. Almeida-Lafetá	1997	01	30		s.n.		J.A. Silva	1977	03	11			América do Sul	Brasil	Minas Gerais	Juiz de Fora	Reserva Biológica Poço D'Anta			-43.3502998352051	-21.7642002105713	36144												Porte herbáceo, flores roxa-claro, local baldio e pastagens.	CESJ014937
UFJF	CESJ	1882	Solanum hexandrum	PreservedSpecimen	Plantae	Angiosperma			Solanaceae	Solanum	hexandrum		Vell.	D.S. Pifano	2004	03			s.n.		Sydney; R.C. Almeida-Lafetá	1979	01	18			América do Sul	Brasil	Minas Gerais	Coração de Jesus				-44.3650016784668	-16.6853008270264	49842												Arbusto, na mata secundária, flores azuis amareladas, com frutos novos verdes.	CESJ001882
UFJF	CESJ	30149	Solanum hexandrum	PreservedSpecimen	Plantae	Angiosperma			Solanaceae	Solanum	hexandrum		Vell.	R.C. Almeida-Lafetá	1997	01	20		s.n.		R.G. Silveira; F.R.G. Salimena; K. Oliveira; L.G. Canani	1996	12	13			América do Sul	Brasil	Minas Gerais	Rio Preto	UHE de Mello			-43.8278007507324	-22.0891990661621	20815												Beira da estrada, a caminho da parcela, arbustos de 1,0 m.	CESJ030149
UFJF	CESJ	30348	Solanum hexandrum	PreservedSpecimen	Plantae	Angiosperma			Solanaceae	Solanum	hexandrum		Vell.						78		R.C. Almeida-Lafetá	1996	03	09			América do Sul	Brasil	Minas Gerais	Juiz de Fora	Reserva Biológica de Santa Cândida			-43.3502998352051	-21.7642002105713	36144												Arbusto, na sombra, local úmido. Flor lilás.	CESJ030348
UFJF	CESJ	30573	Solanum hexandrum	PreservedSpecimen	Plantae	Angiosperma			Solanaceae	Solanum	hexandrum		Vell.						s.n.		F.R.G. Salimena; R.G. Silveira; C.A.N. Ribeiro	1996	09	15			América do Sul	Brasil	Minas Gerais	Rio Preto	UHE de Mello			-43.8278007507324	-22.0891990661621	20815												Área de influência, próximo as parcelas de fitossociologia.	CESJ030573
UFJF	CESJ	31594	Solanum hexandrum	PreservedSpecimen	Plantae	Angiosperma			Solanaceae	Solanum	hexandrum		Vell.	R.M. Castro	2001	04			1761		R.C. Forzza; R.M. Castro; L.F.A. Fazza; L.S. Fernandes	2001	01	24			América do Sul	Brasil	Minas Gerais	Descoberto	Reserva Biológica da Represa do Grama			-42.9674987792969	-21.4596996307373	11991												Arbusto em local alterado. Flores com cálice e corola lilases, anteras amarelas.	CESJ031594
UFJF	CESJ	31942	Solanum hexandrum	PreservedSpecimen	Plantae	Angiosperma			Solanaceae	Solanum	hexandrum		Vell.						s.n.		L.V. Costa	1999	06				América do Sul	Brasil	Minas Gerais	Antônio Dias	RPPN Guilman-Amorim			-42.872200012207	-19.6527996063232	31237												Arbusto, 2,5 m. na clareira em eucaliptal.	CESJ031942
UFJF	CESJ	32656	Solanum hexandrum	PreservedSpecimen	Plantae	Angiosperma			Solanaceae	Solanum	hexandrum		Vell.	D.S. Pifano	2004				s.n.		R.G. Silveira; M.L.G. Lisboa	1993					América do Sul	Brasil	Minas Gerais	Juiz de Fora	Morro do Imperador			-43.3502998352051	-21.7642002105713	36144													CESJ032656
UFJF	CESJ	33986	Solanum hexandrum	PreservedSpecimen	Plantae	Angiosperma			Solanaceae	Solanum	hexandrum		Vell.	D.S. Pifano	2002	07			09		D.S. Pifano; A.S.M. Valente	2001	04	29			América do Sul	Brasil	Minas Gerais	Juiz de Fora	Morro do Imperador			-43.3502998352051	-21.7642002105713	36144												Arbusto ca. 3 m de altura. Flores roxas.	CESJ033986
UFJF	CESJ	34604	Solanum hexandrum	PreservedSpecimen	Plantae	Angiosperma			Solanaceae	Solanum	hexandrum		Vell.	D.S. Pifano	2002	07			s.n.		E.A.C. Romanel	2000	11	18			América do Sul	Brasil	Minas Gerais	Juiz de Fora	Morro do Imperador			-43.3502998352051	-21.7642002105713	36144												Arbusto, ca. 1 m, flores roxas com estames amarelos.	CESJ034604
UFJF	CESJ	44253	Solanum hexandrum	PreservedSpecimen	Plantae	Angiosperma			Solanaceae	Solanum	hexandrum		Vell.	R.C. Almeida-Lafetá	1997	03			253		R.C. Almeida-Lafetá	1997	03	08			América do Sul	Brasil	Minas Gerais	Juiz de Fora	Reserva Biológica de Santa Cândida			-43.3502998352051	-21.7642002105713	36144												Arbusto ca. 1,8 m com flores lilases em local sombreado com frutos.	CESJ044253
UFJF	CESJ	44913	Solanum hexandrum	PreservedSpecimen	Plantae	Angiosperma			Solanaceae	Solanum	hexandrum		Vell.	G.S. França					548		G.S. França; F.Raggi	2004	05	05			América do Sul	Brasil	Minas Gerais	Timóteo	Parque Estadual do Rio Doce, Lat: 19°35'28" S, Lon: 42°34'07" W. Alt: 248 m.			-42.644401550293	-19.5825004577637	16391												Arbusto 1,5 m, flor arroxeada, borda de mata. Macuco.	CESJ044913
UFJF	CESJ	50567	Solanum hexandrum	PreservedSpecimen	Plantae	Angiosperma			Solanaceae	Solanum	hexandrum		Vell.						1426		R.M. Castro; P.O Garcia; J.F.S. Pessôa	2007	10				América do Sul	Brasil	Minas Gerais	Santo Antônio do Grama				-42.6086006164551	-20.3143997192383	8777												Arbusto, Floresta Estacional Semidecidual Montana, borda da mata, flores liláses,frutos verdes.	CESJ050567
UFJF	CESJ	50612	Solanum hexandrum	PreservedSpecimen	Plantae	Angiosperma			Solanaceae	Solanum	hexandrum		Vell.	I.Almeida; B. Paixão-Souza	2008	08	19		22		I.Almeida; S.A. Roman; F.R.G. Salimena	2008	03	25			América do Sul	Brasil	Minas Gerais	Juiz de Fora	Mata do Krambeck			-43.3502998352051	-21.7642002105713	36144												Arvoreta em borda de mata, área antropizada; flores roxas com estames amarelos	CESJ050612
UFJF	CESJ	53133	Solanum hexandrum	PreservedSpecimen	Plantae	Angiosperma			Solanaceae	Solanum	hexandrum		Vell.						s.n.		("prof. Fac. Química")	2009	04	02			América do Sul	Brasil	Minas Gerais	Juiz de Fora	Campus da UFJF			-43.3502998352051	-21.7642002105713	36144													CESJ053133
UFJF	CESJ	55315	Solanum hexandrum	PreservedSpecimen	Plantae	Angiosperma			Solanaceae	Solanum	hexandrum		Vell.						s.n.		C. Duque Estrada; et al.	2003	06	06			América do Sul	Brasil	Minas Gerais	Juiz de Fora	Campus da UFJF - Lago dos Manacás			-43.3502998352051	-21.7642002105713	36144												Arvoreta, aprox. 2m, flores roxas, borda externa da mata.	CESJ055315
UFJF	CESJ	7337	Solanum hexandrum	PreservedSpecimen	Plantae	Angiosperma			Solanaceae	Solanum	hexandrum		Vell.	E.A. Feliciano	2007	11	16		CESJ7337		L. Krieger	1969	10				América do Sul	Brasil	Minas Gerais	Juiz de Fora				-43.3502998352051	-21.7642002105713	36144												Árvore baixo, flores roxas.	CESJ007337
UFJF	CESJ	7453	Solanum hexandrum	PreservedSpecimen	Plantae	Angiosperma			Solanaceae	Solanum	hexandrum		Vell.	D.S. Pifano	2004	03			CESJ7453		L. Krieger	1969	11				América do Sul	Brasil	Minas Gerais	Juiz de Fora				-43.3502998352051	-21.7642002105713	36144												Arbusto alto, flores roxas.	CESJ007453
UFJF	CESJ	7515	Solanum hexandrum	PreservedSpecimen	Plantae	Angiosperma			Solanaceae	Solanum	hexandrum		Vell.	J.R. Stehmann	1996	05			CESJ7515		L. Krieger	1969	10				América do Sul	Brasil	Minas Gerais	Juiz de Fora				-43.3502998352051	-21.7642002105713	36144												Arbusto alto, flores roxas.	CESJ007515
MCN-FZBRS	HAS	87531	Solanum hexandrum	PreservedSpecimen	Plantae	Magnoliophyta			Solanaceae	Solanum	hexandrum		Vell.	Giacomin, L.L.	2015	07	10		s.n.		Mattos, J.	1962	12					Brasil	Minas Gerais	Teófilo Oton	Entre Teófilo Oton e Nanuque																	Numa capoeira em lugar rochoso. Arbusto com flores grandes.
MCN-FZBRS	HAS	87536	Solanum hexandrum	PreservedSpecimen	Plantae	Magnoliophyta			Solanaceae	Solanum	hexandrum		Vell.	Giacomin, L.L.	2015	07	10		s.n.		Leitão Filho, H.F.	1967	06					Brasil	São Paulo	Santo Antônio da Posse																		Na mata.
IBt	SP	15348	Solanum hexandrum	S	Plantae				Solanaceae	Solanum	hexandrum		Vell.	Morton, CV					CGG1868		Loefgren, A; Edwall, G	1892	09	16				Brasil	São Paulo	São Luís do Paraitinga	Rua.			-45.310001373291	-23.2199993133545	27362												Arbusto sublenhoso, 2m, fol. hirs. fl. violacea.	SP008639
IBt	SP	15355	Solanum hexandrum	S	Plantae				Solanaceae	Solanum	hexandrum		Vell.	Toledo, JF	1951	03	31		CGG3129		Loefgren, A	1895	08	01				Brasil	São Paulo	São Sebastião	Mata virgem, Guaicá.			-45.4099998474121	-23.7600002288818	41977												Arbust. sublign. aculeat. hisp. fl. speciosa azul, fol. magna.	SP008638
IBt	SP	216562	Solanum hexandrum	S	Plantae				Solanaceae	Solanum	hexandrum		Vell.	Knapp, S	2013				1889		Kirizawa, M	1987	08	20				Brasil	Rio de Janeiro	Paraty	Estrada de terra Parati - Cunha, 8 km de Parati			-44.7131004333496	-23.2178001403809	34470
UNICAMP	UEC	111296	Solanum hexandrum	S	Plantae	Magnoliopsida			Solanaceae	Solanum	hexandrum		Vell.	Stehmann, JR	2000	02			587		Freitas, L	1999	02	24				Brazil	São Paulo	São José do Barreiro				-44.5699996948242	-22.6399993896484	30784												Arbusto ca. 1,5 m. Flores:corola púrpura Violáceo com anteras amarelo e Púrpura.; Floresta Ombrófila Densa, montana.SP221Km 13.	UEC047341
UNICAMP	UEC	172905	Solanum hexandrum	S	Plantae	Magnoliopsida			Solanaceae	Solanum	hexandrum		Vell.	Stehmann, JR	2019	07	10		2454		Pedroni, F; Sanchez, M; Laps, RR; Belinello, R	1997	01	18				Brazil	São Paulo	Ubatuba	Picinguaba. Morro do Corisco altitude 600 m, arbusto com frutos imaturos.	-44.835	-23.333333					120	120									Arbusto com botões.; Mata Atlântica de Encosta.	UEC084888
UNICAMP	UEC	181444	Solanum hexandrum	S	Plantae	Magnoliopsida			Solanaceae	Solanum	hexandrum		Vell.	Aranha, C	1992	08	13		59826		Davis, PH; Shepherd, GJ; Makino, H; Silvestre, MS; Jung, SL	1976	08	21				Brazil	São Paulo	Ubatuba	Serra do Mar.			-45.0699996948242	-23.4300003051758	34265		50	100									Edge of Rain forest. Large soft Shrub. Flores large, lilac. Stellate hairs on leaves.	UEC047345
UNICAMP	UEC	181445	Solanum hexandrum	S	Plantae	Magnoliopsida			Solanaceae	Solanum	hexandrum		Vell.	Stehmann, JR	1996	10			9265		Vasconcellos-Neto, J	1970	01	13				Brazil	Rio de Janeiro		Estrada Rio - Santos.																	Em cachoeira. Solanacea até 1m - Flores roxas.	UEC047343
UNICAMP	UEC	181446	Solanum hexandrum	S	Plantae	Magnoliopsida			Solanaceae	Solanum	hexandrum		Vell.	Stehmann, JR	2000	02	04		32388		Goldenberg, E; Rezende, AA; et al.	1994	12	13				Brazil	São Paulo	Ubatuba	Ilha Anchieta, rilha da Prainha.			-45.0699996948242	-23.4300003051758	34265												Flores lilases, frutos verdes, espinhos no caule e nas folhas, arbusto.	UEC047342
UNICAMP	UEC	181447	Solanum hexandrum	S	Plantae	Magnoliopsida			Solanaceae	Solanum	hexandrum		Vell.	Chiarini, F	2003				2634		Esteves, GL; Rodrigues, EA; Shirasuna, RT; Catharino, ELM	1994	09	27				Brazil	São Paulo	Bananal	Serra da Bocaina. Estrada para Madeirite.			-44.3199996948242	-22.6800003051758	26795												Arbusto, cerca de !,5m de altura; corola roxo-clara; cálice arroxeado; indumento ferrugíneo.	UEC047338
UNICAMP	UEC	181480	Solanum hexandrum	S	Plantae	Magnoliopsida			Solanaceae	Solanum	hexandrum		Vell.	Giacomin, LL	2011	09			s.n.		Gonçalves, P	1987	02	03				Brazil	São Paulo	São Sebastião				-45.4099998474121	-23.7600002288818	41977													UEC047217
UNICAMP	UEC	181481	Solanum hexandrum	S	Plantae	Magnoliopsida			Solanaceae	Solanum	hexandrum		Vell.	Stehmann, JR; Giacomin, LL	2011	09			138		Mantovani, W	1979	10	23				Brazil	São Paulo	Bananal	Estrada de aceso à RESERVA FLORESTAL.			-44.3199996948242	-22.6800003051758	26795												Arbusto de 2m. flores lilases.	UEC047215
UNICAMP	UEC	182949	Solanum hexandrum	S	Plantae	Magnoliopsida			Solanaceae	Solanum	hexandrum		Vell.	Tamashiro, JY	2014	12	01		77		Vinha, D							Brazil	São Paulo	São Luiz do Paraitinga	mata							1100	1100									Plântula originada no banco de sementes do solo e cultivada em casa de vegetação. Coletas de solo realizadas nas parcelas K e N do projeto Biota Gradiente Funcional, localizadas no Núcleo Santa Virgínia, Parque Estadual da Serra do Mar	UEC011397
UNICAMP	UEC	186805	Solanum hexandrum	S	Plantae	Magnoliopsida			Solanaceae	Solanum	hexandrum		Vell.						1717		Flores, TB; Campos, OR	2012	10	30				Brazil	Espírito Santo	Castelo	Estrada entre a sede do Parque Estadual do Forno Grande eo povoado de Pedregulho.			-41.184700012207	-20.6035995483398	23588												Erva,ca.1m de alt. Cálice verde, corola alva, androceu amarelo.	UEC116534
UNICAMP	UEC	45637	Solanum hexandrum	S	Plantae	Magnoliopsida			Solanaceae	Solanum	hexandrum		Vell.	Stehmann, JR	1996	10	10		333		Weyland Vieira, MC	1982	03	12				Brazil	Minas Gerais	Caratinga	Fazenda Montes Claros.			-42.1391983032227	-19.7896995544434	49886												Arbusto-Flores Lilazes.	UEC047218
UNICAMP	UEC	47625	Solanum hexandrum	S	Plantae	Magnoliopsida			Solanaceae	Solanum	hexandrum		Vell.	Carvalho, LF	1990				17		Boechat, SL	1986	10	09				Brazil	Minas Gerais	Tombos	Parque F. Municipal da Cachoeira.			-42.0228004455566	-20.9046993255615	16749												Flor lilás, frutos brancos, parte foleares com espinhos.	UEC074132
UNICAMP	UEC	52360	Solanum hexandrum	S	Plantae	Magnoliopsida			Solanaceae	Solanum	hexandrum		Vell.	Stehmann, JR	1996	10	10		16985		Costa, APL	1984	09					Brazil	Minas Gerais	Juiz de Fora	Reserva Biológica Municipal do Poço D'Anta. Em Beira de Mata.			-43.3502998352051	-21.7642002105713	36144													UEC047339
UNICAMP	UEC	63222	Solanum hexandrum	S	Plantae	Magnoliopsida			Solanaceae	Solanum	hexandrum		Vell.	Stehmann, JR					12010		s/ coletor	1987	11	27				Brazil	Minas Gerais	Caratinga	Estação Biológica de Caratinga.			-42.1391983032227	-19.7896995544434	49886												Arbusto 1,5m. Pétala roxa cheia espinhos coletada em morro pelado, presença de mamangava.	UEC047344
UNICAMP	UEC	67917	Solanum hexandrum	S	Plantae	Magnoliopsida			Solanaceae	Solanum	hexandrum		Vell.						29801		Ponte, ACE; et al.	1993	11	11				Brazil	São Paulo	Ubatuba	Morro do Puraba, mata degradada na encosta.			-45.0699996948242	-23.4300003051758	34265												Arbusto ca. 2 m altura, na beira do riacho, flores azuis grande.	UEC074135
UNICAMP	UEC	80007	Solanum hexandrum	S	Plantae	Magnoliopsida			Solanaceae	Solanum	hexandrum		Vell.	Kuhlmann, M					2678		Kuhlmann, M	1951	03	23				Brazil	Rio de Janeiro	Angra dos Reis	Fazenda Japuhyba.	-44.647222	-23.044167															A margem do corrego.	UEC074134
UNICAMP	UEC	85159	Solanum hexandrum	S	Plantae	Magnoliopsida			Solanaceae	Solanum	hexandrum		Vell.	Stehmann, JR; Giacomin, LL	2011	09			s.n.		Hoehne, FC; Gehrt, A	1940	05	27				Brazil	São Paulo	Ubatuba	Serra de Ubatuba.			-45.0699996948242	-23.4300003051758	34265												Arbusto, flor azul.	UEC047216
UFOPA	HSTM	5850	Solanum hexandrum	S	Plantae				Solanaceae	Solanum	hexandrum		Vell.						1827		Giacomin, L.L.; Bohs, L.; Gouvêa, Y.F.	2012	06	02				Brasil	Rio de Janeiro	Santa Maria Madalena	Estrada que subia para o MiranteTorre (Morro Antena). Área degradada limírofe à plantação de Eucalyptus spp.; margem da estrada não pavimentada.	-42.031667	-21.978333					745	745										HSTM005850
USP	SPF	122247	Solanum hexandrum	PreservedSpecimen	Plantae				Solanaceae	Solanum	hexandrum		Vell.	Souza, VC	1996	12			894		Souza, JP	1996	12	14				Brasil	São Paulo	Cunha		-45.041667	-23.255556																SPF00122247
USP	SPF	130342	Solanum hexandrum	PreservedSpecimen	Plantae				Solanaceae	Solanum	hexandrum		Vell.	Stehmann, JR	1997	09			3513		Salino, A	1997	09	29				Brasil	Minas Gerais	Jequeri				-42.6657981872559	-20.4557991027832	22280													SPF00130342
USP	SPF	138546	Solanum hexandrum	PreservedSpecimen	Plantae				Solanaceae	Solanum	hexandrum		Vell.	Anônimo					1727		Mello-Silva, R	1999	10	15				Brasil	São Paulo	Ubatuba	Ilha Anchieta			-45.0699996948242	-23.4300003051758	34265													SPF00138546
USP	SPF	160223	Solanum hexandrum	PreservedSpecimen	Plantae				Solanaceae	Solanum	hexandrum		Vell.	França, GS					348		França, GS	2003	06	04				Brasil	Minas Gerais	Marliéria				-42.7322006225586	-19.7122001647949	28215		336	336										SPF00160223
USP	SPF	165687	Solanum hexandrum	PreservedSpecimen	Plantae				Solanaceae	Solanum	hexandrum		Vell.	Agra, MF	2009				1987		Fiaschi, P	2004	02	14				Brasil	Bahia	Jussari	RPPN Serra do Teimoso	-39.536111	-15.160278																SPF00165687
USP	SPF	38180	Solanum hexandrum	PreservedSpecimen	Plantae				Solanaceae	Solanum	hexandrum		Vell.	Agra, MF	1996	07			1032		Pirani, JR	1985	01	10				Brasil	Rio de Janeiro	Conceição de Macabu				-41.8683013916016	-22.0853004455566	20978													SPF00038180
MCN-PUC-MINAS	HPUC-MG	ANG533	Solanum hexandrum	S	Plantae				Solanaceae	Solanum	hexandrum										Maielo - Silva, L.	2010	01	08				Brasil	Minas Gerais	Muriaé	Muriaé			-42.3664016723633	-21.1305999755859	32715												Nº IBAMA (CTF) = 4477412
MCN-PUC-MINAS	HPUC-MG	ANG534	Solanum hexandrum	S	Plantae				Solanaceae	Solanum	hexandrum										Maielo - Silva, L.	2009	12	20																								Nº IBAMA (CTF) = 4477412
MCN-PUC-MINAS	HPUC-MG	ANG541	Solanum hexandrum	S	Plantae				Solanaceae	Solanum	hexandrum										Maielo - Silva, L.	2009	09	21				Brasil	Rio de Janeiro	Itaperuna	Itaperuna			-41.8877983093262	-21.2049999237061	32377												Nº IBAMA (CTF) = 4477412
MCN-PUC-MINAS	HPUC-MG	ANG542	Solanum hexandrum	S	Plantae				Solanaceae	Solanum	hexandrum										Maielo - Silva, L.	2009	09	22				Brasil	Rio de Janeiro	Itaperuna	Itaperuna			-41.8877983093262	-21.2049999237061	32377												Nº IBAMA (CTF) = 4477412
MNHN	MNHN_P_PC_BR	P00578125	Solanum hexandrum	S	Plantae				Solanaceae	Solanum	hexandrum		Vell.	Nee	2007				A1 379		Saint-Hilaire, A. de	1816						Brasil															hb					NYBG	P00578125
MNHN	MNHN_P_PC_BR	P00578126	Solanum hexandrum	S	Plantae				Solanaceae	Solanum	hexandrum		Vell.						A1 379		Saint-Hilaire, A. de	1816						Brasil															hb						P00578126
MNHN	MNHN_P_PC_BR	P00578390	Solanum hexandrum	S	Plantae				Solanaceae	Solanum	hexandrum		Vell.	Giacomin	2013				B1 1046		Saint-Hilaire, A. de	1816	1	1				Brasil															hb				P00578390		P00578390
MNHN	MNHN_P_PC_BR	P00578391	Solanum hexandrum	S	Plantae				Solanaceae	Solanum	hexandrum		Vell.	Giacomin	2013				B1 1046		Saint-Hilaire, A. de	1816	1	1				Brasil															hb				P00578391		P00578391
MNHN	MNHN_P_PC_BR	P00578392	Solanum hexandrum	S	Plantae				Solanaceae	Solanum	hexandrum		Vell.	Giacomin	012013				Voyage d'Auguste de Saint-Hilaire de 1816 à 1821/13		Saint-Hilaire, A. de							Brasil															hb				P00578392		P00578392
MNHN	MNHN_P_PC_BR	P00594884	Solanum hexandrum	S	Plantae				Solanaceae	Solanum	hexandrum		Vell.	Mentz	2007				A1 379		Saint-Hilaire, A. de	1816						Brasil															hb					ICN-UFRGS	P00594884
MNHN	MNHN_P_PC_BR	P00594885	Solanum hexandrum	S	Plantae				Solanaceae	Solanum	hexandrum		Vell.	Mentz	2007				B2 33		Saint-Hilaire, A. de							Brasil															hb					ICN-UFRGS	P00594885
MNHN	MNHN_P_PC_BR	P00614723	Solanum hexandrum	S	Plantae				Solanaceae	Solanum	hexandrum		Vell.						C 48		Saint-Hilaire, A. de	1816	1	1				Brasil															hb				P00614723	operation de numerisation 2010-2012	P00614723
MNHN	MNHN_P_PC_BR	P00614723	Solanum hexandrum	S	Plantae				Solanaceae	Solanum	hexandrum		Vell.	Agra	2008				C 48		Saint-Hilaire, A. de	1816	1	1				Brasil															hb				P00614723		P00614723
MNHN	RECOLNAT_GLAZIOU	P00335674	Solanum hexandrum	S	Plantae				Solanaceae	Solanum	hexandrum		Vell.						8848		Glaziou, A.	1876	9	23				Brasil															hb				P00335674		P00335674
MNHN	RECOLNAT_GLAZIOU	P00335675	Solanum hexandrum	S	Plantae				Solanaceae	Solanum	hexandrum		Vell.						8848		Glaziou, A.	1876	9	23				Brasil															hb				P00335675		P00335675
MNHN	RECOLNAT_GLAZIOU	P00335676	Solanum hexandrum	S	Plantae				Solanaceae	Solanum	hexandrum		Vell.						8848		Glaziou, A.	1876	9	23				Brasil															hb				P00335676		P00335676
MNHN	RECOLNAT_GLAZIOU	P00335677	Solanum hexandrum	S	Plantae				Solanaceae	Solanum	hexandrum		Vell.						8848		Glaziou, A.	1876	9	23				Brasil															hb				P00335677		P00335677
MNHN	RECOLNAT_GLAZIOU	P00337073	Solanum hexandrum	S	Plantae				Solanaceae	Solanum	hexandrum		Vell.	Agra	2008				3777		Glaziou, A.	1869						Brasil															hb				P00337073	frutescent, fleurs bleues	P00337073
MNHN	RECOLNAT_GLAZIOU	P00337073	Solanum hexandrum	S	Plantae				Solanaceae	Solanum	hexandrum		Vell.						3777		Glaziou, A.	1869						Brasil															hb				P00337073	operation de numerisation 2010-2012 frutescent, fleurs bleues	P00337073
MNHN	RECOLNAT_GLAZIOU	P00337074	Solanum hexandrum	S	Plantae				Solanaceae	Solanum	hexandrum		Vell.	Agra	2008				5960		Glaziou, A.	1872	8	23				Brasil															hb				P00337074		P00337074
MNHN	RECOLNAT_GLAZIOU	P00337074	Solanum hexandrum	S	Plantae				Solanaceae	Solanum	hexandrum		Vell.						5960		Glaziou, A.	1872	8	23				Brasil															hb				P00337074	operation de numerisation 2010-2012	P00337074
MNHN	RECOLNAT_GLAZIOU	P00337075	Solanum hexandrum	S	Plantae				Solanaceae	Solanum	hexandrum		Vell.						3777		Glaziou, A.	1869	8	26				Brasil															hb				P00337075	operation de numerisation 2010-2012	P00337075
MNHN	RECOLNAT_GLAZIOU	P00337075	Solanum hexandrum	S	Plantae				Solanaceae	Solanum	hexandrum		Vell.	Agra	2008				3777		Glaziou, A.	1869	8	26				Brasil															hb				P00337075		P00337075
MNHN	RECOLNAT_GLAZIOU	P00337083	Solanum hexandrum	S	Plantae				Solanaceae	Solanum	hexandrum		Vell.						5960		Glaziou, A.							Brasil															hb				P00337083	operation de numerisation 2010-2012 reçu le 10 janvier 1870	P00337083
MNHN	RECOLNAT_GLAZIOU	P00337083	Solanum hexandrum	S	Plantae				Solanaceae	Solanum	hexandrum		Vell.	Agra	2008				5960		Glaziou, A.							Brasil															hb				P00337083	reçu le 10 janvier 1870	P00337083
MNHN	RECOLNAT_GLAZIOU	P00571127	Solanum hexandrum	S	Plantae				Solanaceae	Solanum	hexandrum		Vell.	Nee	2007				13082		Glaziou, A.							Brasil															hb				P00571127		P00571127
FURB	FURB	18183	Solanum hexandrum	PreservedSpecimen	Plantae				Solanaceae	Solanum	hexandrum		Vell.	Giacomin, LL	2012	02			3136		Verdi, M.	2009	09	17				Brasil	São Paulo	Cruzeiro	Serra da Matiqueira.	-45.0038889	-22.4683334					1176	1176										FURB03596
UNESP-IBILCE	SJRP	01627	Solanum hexandrum	S	Plantae	Tracheophyta	Magnoliopsida	Solanales	Solanaceae	Solanum	hexandrum		Vell.	F.C. Hoehne					28		M.A. Pereira	1946	05	01			América do Sul	Brasil	São Paulo	Ubatuba	serra de ubatuba			-45.0699996948242	-23.4300003051758	34265												Geografia: lugares sombrios, flor roxa;
CEPLAC	CEPEC	101354	Solanum hexandrum	S	Plantae				Solanaceae	Solanum	hexandrum			M. de F. Agra					1987		P. Fiaschi	2004	02	14				Brasil	Bahia	JUSSARÍ	Estrada Jussarí/Palmira, entrada a esq. Ca. 7,5Km após Jussarí. Fazenda Teimsos. RPPN Serra do Teimoso.	-39.536111	-15.160278														30/12/2009
CEPLAC	CEPEC	125121	Solanum hexandrum	S	Plantae				Solanaceae	Solanum	hexandrum			Y. F. Gouvêa					2012		C. N. Fraga							Brasil	Espírito Santo	castelo				-41.184700012207	-20.6035995483398	23588												<ll>dwc_commonname:</ll>
CEPLAC	CEPEC	125463	Solanum hexandrum	S	Plantae				Solanaceae	Solanum	hexandrum			Y. F. Gouvêa					7124		A. M. Amorim							Brasil	Espírito Santo	cariacica				-40.4199981689453	-20.2639007568359	18507												<ll>dwc_commonname:</ll>
CEPLAC	CEPEC	125507	Solanum hexandrum	S	Plantae				Solanaceae	Solanum	hexandrum			J. R. Stehmann & L.L.Giacomin					5029		R. C. Forzza							Brasil	Espírito Santo	cariacica				-40.4199981689453	-20.2639007568359	18507												<ll>dwc_commonname:</ll>
CEPLAC	CEPEC	133283	Solanum hexandrum	S	Plantae				Solanaceae	Solanum	hexandrum			Y. F. Gouvêa					298		T. M. Machado	1988	12	01				Brasil	Minas Gerais	Alto caparaó	Parque Nacional do Caparaó. Estrada para macieira.	-41.816667	-20.483333														30/09/2013
CEPLAC	CEPEC	84201	Solanum hexandrum	S	Plantae				Solanaceae	Solanum	hexandrum			L. L. Giacomin					6866		A. M. de Carvalho	1992	06	08				Brasil	Bahia	JUSSARÍ	Reserva Particular do Patrimônio Natural (RPPN), entrada a 7,5Km na Rod. Jussarí/Palmira. Faz. Teimoso, 1,7Km da entrada.	-39.531111	-15.154444														30/09/2013
UEL	FUEL	35465	Solanum hexandrum	PreservedSpecimen	Plantae	Tracheophyta		Solanales	Solanaceae	Solanum	hexandrum		Vell.						2388		Lombardi, JA; et al.	1998	09	06				Brasil	Minas Gerais	Caratinga	Estação Biológica de Caratinga, Fazenda Montes Cla, Fazenda Montes Claros			-42.1391983032227	-19.7896995544434	49886												Arbusto ca. 2m; folhas papiráceas, cálice e corola lilás, estames amarelos; Mata Atlântica, área alagada na beira do córrego; próximo ao Alojamento.
UEL	FUEL	36847	Solanum hexandrum	PreservedSpecimen	Plantae	Tracheophyta		Solanales	Solanaceae	Solanum	hexandrum		Vell.	França, GS					548		França, GS; Raggi, F	2004	05	05				Brasil	Minas Gerais	Timóteo	Parque Estadual Rio Doce			-42.644401550293	-19.5825004577637	16391												Arbusto 1,5m; flor arroxeada; borda da mata; Macuco.
UEL	FUEL	36848	Solanum hexandrum	PreservedSpecimen	Plantae	Tracheophyta		Solanales	Solanaceae	Solanum	hexandrum		Vell.	França, GS					348		França, GS	2003	06	04				Brasil	Minas Gerais	Marliéria	Fazenda Paraíso			-42.7322006225586	-19.7122001647949	28215												Arbusto 4m; flores arroxeadas; margem de córrego; floresta estacional semidecidual.
UTFPR	HCF	27024	Solanum hexandrum	S	Plantae				Solanaceae	Solanum	hexandrum		Vell.	J.R. Stehmann	2006				62938		G. Hatschbach	1995	08	10				Brasil	ES	Linhares	Lagoa Jupará			-40.0722007751465	-19.3910999298096	48094												arbusto de ramos longos, até 2 m, apoiante; flor alva. Margens da lagoa.
UFPB	JPB	24245	Solanum hexandrum	PreservedSpecimen	Plantae	Angiosperma		Dicotyledon	Solanaceae	Solanum	hexandrum		Vell.	Agra, MF	1993	11	26		1508		Barbosa, MR; et al.	1993	11	15			Southern America	Brasil	Rio de Janeiro	Parati	Laranjeiras, caminho para a praia do Sonho.			-44.7131004333496	-23.2178001403809	34470												; DESC: Arbusto ca. 60 cm de alt.; flor lilás com espinhos.
UFPB	JPB	53591	Solanum hexandrum	PreservedSpecimen	Plantae	Angiosperma		Dicotyledon	Solanaceae	Solanum	hexandrum		Vell.	Bovini, MG	2001	07			23/55		Quinet, A	2000	12	04			Southern America	Brasil	Rio de Janeiro	Magé	Distrito de Piabetá, Comum no local.	-43.123611	-22.570556					300	300									; HABITAT: Mata de encosta sobre solo argilo-arenoso, luminosidade intensa.; DESC: Arbusto de 2,5 m. alt.; DAP 4 cm.; Flores verde-marrom; Folha verde discolor.	JPB0053591
UFPB	JPB	55221	Solanum hexandrum	PreservedSpecimen	Plantae	Angiosperma		Dicotyledon	Solanaceae	Solanum	hexandrum		Vell.	Chiarini, F	2003	07	17		662		Carvalho, LDF	1987	09	27			Southern America	Brasil	Rio de Janeiro	Teresópolis	Granja Mafra, Lote 13 subespontânea; Distr. Laje, estr. para Campo Limpo.			-42.9655990600586	-22.4122009277344	38539												; DESC: Subarbusto deca. 1,5 m alt.; flor violáceas.	JPB0055221
MBML	MBML-HERBARIO	27778	Solanum hexandrum		Plantae				Solanaceae	Solanum	hexandrum			J. R. Stehmann/30-10-2007					467		L. F. S. Magnago; V. Demuner, M. Belizário, E. Bausen	2006	01	05				Brasil	Espírito Santo	Santa Leopoldina	Fazenda Caioaba, propr.:Virloni, Mata, trilha do corrego Caioaba.	-40.470556	-20.059167					150	150									Arbusto de 1,5,m. Flores e frutos roxos. Rupícula. Mata beira do corrego.	MBML027778
MBML	MBML-HERBARIO	30241	Solanum hexandrum		Plantae				Solanaceae	Solanum	hexandrum			J. R. Stehmann/30-10-2007					4131		V. Demuner; R. R. Vervloet, M. Belisario e Elias Bausen.	2007	05	30				Brasil	Espírito Santo	Santa Leopoldina	Colina Verde (Morro do Agudo), propr.: Israel Elias Ramos (trilha acima do bananal).	-40.44	-20.098056					300	300									Arbusto 2m botões florais, flores pétalas roxas, sépalas vinho, frutos imaturos verdes. Interior de mata.	MBML030241
MBML	MBML-HERBARIO	31521	Solanum hexandrum		Plantae				Solanaceae	Solanum	hexandrum			J. R. Stehmann/30-10-2007					3372		R.R. Vervloet; V. Demuner, E. Bausen, T. A. Cruz	2007	08	30				Brasil	Espírito Santo	Santa Leopoldina	Colina Verde, Morro do Agudo, D. Maria	-40.43	-20.095556					150	150									Herbáceae 1,5m, flores de cor lilás. Mata.	MBML031521
MBML	MBML-HERBARIO	3979	Solanum hexandrum		Plantae				Solanaceae	Solanum	hexandrum			J. R. Stehmann/2006					239		J. M. Vimercat	1984	10	25				Brasil	Espírito Santo	Santa Leopoldina	Rio da Prata	-40.538611	-20.065556															Arbusto de +/- 1,5m, flores roxas, solo úmido, altitude de +/- 500m.	MBML003979
MBML	MBML-HERBARIO	45148	Solanum hexandrum		Plantae				Solanaceae	Solanum	hexandrum			Y.F. Gouvêa/março-2019					690		D.R. Couto	2008	07	18				Brasil	Espírito Santo	Alegre	ARIE Laerth Paiva Gama			-41.5331001281738	-20.763599395752	26101		400	400									Arbusto, flor branca. Próxima ao brejo	MBML045148
MBML	MBML-HERBARIO	52664	Solanum hexandrum		Plantae				Solanaceae	Solanum	hexandrum			L.L. Giacomin/Março-2018					1833		L.L. Giacomin; L. Bohs & Y.F. Gouvêa	2012	06	03				Brasil	Rio de Janeiro	Varre-Saí	Estrada que liga Natividade a Varre-Saí, fragmento de floresta ciliar isolado numa matriz de pastagem, marginal a estrada, ca 5km SW (antes)( de Varre-Saí	-41.916667	-20.994444					310	310									Arbusto ereto, 3m, crescendo a sombra. Flores com pétalas roxas, cálice verde, fortemente acrescente. Frutos alvos, 1-2cm diam.	MBML052664
MN	R	232038	Solanum hexandrum	S	Plantae				Solanaceae	Solanum	hexandrum		Vell.	Giacomin, L.L.	2009	08			625		Lucas, E.J.; Mazine, F.F.; Brummitt, N.A.; Campos, O.R.; Flores, T.B.; Jennings, L.V.S. & Sampaio D.	2006	11	21				Brasil	Rio de Janeiro	Teresópolis	Parque Nacional da Serra dos órgãos, trilha Mozart-Catão			-42.9655990600586	-22.4122009277344	38539		1100	1100										R010036404
G	G-DC	G00131659	Solanum sublentum	S	Plantae				Solanaceae	Solanum	sublentum		Hiern	Agra, M. F.	2008	01	01		621		Lund, P. W.	1834		00			AMERIQUE DU SUD	Brazil				-53.08972222	-10.77305556															Coordinate uncertainty: Precision at the level of country Image URL: http://www.ville-ge.ch/musinfo/bd/cjb/chg/adetail.php?id=153279&base=img&lang=en
BS	M	M-0000007	Solanum sublentum	S	Plantae	Magnoliophyta	Magnoliopsida	Solanales	Solanaceae	Solanum	sublentum		Hiern					NOTATYPE			Pohl, J.B.E.							Brasil			Legit in Brasilia
BS	M	M-0164207	Solanum sublentum	S	Plantae	Magnoliophyta	Magnoliopsida	Solanales	Solanaceae	Solanum	sublentum		Hiern					NOTATYPE			Martius, C.F.P. von							Brasil			Brasilia Provinc. Sebastianopol.
BM	SOLANACEAE_SOURCE_BR	27345	Solanum sublentum	O	Plantae	Magnoliophyta	Dicotyledoneae	Solanales	Solanaceae	Solanum	sublentum		Hiern	Knapp, S.	2007	11		isotype	s.n.		Warming, J.E.B.	1866	12	29			Southern America	Brazil	Minas Gerais		Lagoa Santa														S04-2985
BM	SOLANACEAE_SOURCE_BR	57220	Solanum sublentum	O	Plantae	Magnoliophyta	Dicotyledoneae	Solanales	Solanaceae	Solanum	sublentum		Hiern	Knapp, S.	2011	08			3373		Nee, M.	1970	10	10			Southern America	Brazil	Rio de Janeiro		Rio de Janeiro, above Rua Aprazivel and Rua Fr. de Andrade							200	200									shrub 1 m; flowers blue, 4.5 cm diam.; fruit green; steep rocky goat pastured slope
MOBOT	MOBOT_BR	1058430	Solanum sublentum	S	Plantae				Solanaceae	Solanum	sublentum		Hiern						Warming s.n.		J.E.B. Warming						South America	Brazil
MOBOT	MOBOT_BR	2994287	Solanum sublentum	S	Plantae				Solanaceae	Solanum	sublentum		Hiern	M.F. Agra, (JPB), Sept.	1999				Widgren s.n.		Johan F. Widgren	1844					South America	Brazil	Rio de Janeiro
MOBOT	MOBOT_BR	2994352	Solanum sublentum	S	Plantae				Solanaceae	Solanum	sublentum		Hiern	M.F. Agra, (JPB), Sept.	1999				Webster 25426		Grady L. Webster	1984	10	17			South America	Brazil	São Paulo		Campinas: Fazenda Santa Eliza, semi-deciduous forest.	-47.06666	-22.86666					650	650
MOBOT	MOBOT_BR	2994368	Solanum sublentum	S	Plantae				Solanaceae	Solanum	sublentum		Hiern	M. Nee	1982				Hatschbach 34747		Gert G. Hatschbach	1974	07	24			South America	Brazil	Goiás		Rod. BR-364.
UNIVILLE	JOIW	132	Solanum sublentum	S	Plantae				Solanaceae	Solanum	sublentum		Hiern.						2812		G.C.T.Ceccantini	2006	04	28				Brasil	MG	Matozinhos	Fazenda Cauaia, arredores do sítio arqueológico Lapa do Santo, borda de mata semi-decídua sobre calcário	-44.015167	-19.477194					702	702									Arbusto armado, 1m alt., DB 3cm, corola Violeta, cálice glanduloso e aglutinante, estames amarelos e madeira muito dura. Madeira de galho coletada
F	F_BOTANY_BR	V0147132F	Solanum sublentum	S	Plantae	Spermatophyta	Dicotyledoneae		Solanaceae	Solanum	sublentum																South America	BRAZIL				-52.8731	-10.8339
F	F_BOTANY_BR		Solanum sublentum	S	Plantae	Spermatophyta	Dicotyledoneae		Solanaceae	Solanum	sublentum							Type [status unknown			J. E. B. Warming						South America	BRAZIL				-52.8731	-10.8339
ESALQ	ESA	141099	Solanum sublentum	S	Plantae				Solanaceae	Solanum	sublentum		Hiern	Assis, L.S.	2017	05	30		29		Silva, T.D.; Assis, L.S.; Gardon, F.R.; Lozano-Baez, S.E.; Mazzeo, R.R.; Zanini, A.N.; Souza, V.C.; Rodrigues, R.R.; Colletta, G. D.; Koch, I.	2017	04	19				Brasil	Rio de Janeiro	Rio de Janeiro	Ilha do Governador; Base de Fuzileiros Navais; Trilha da DIVANF; Floresta Ombrófila Densa	-43.1625	-22.7783															Arbusto; 3 metros de altura
SMITHSONIAN	US	1484483	Solanum sublentum	PreservedSpecimen	Plantae		Dicotyledonae	Solanales	Solanaceae	Solanum	sublentum		Hieron.						32		L. Riedel	1905	01	04			South America - Neotropics	Brazil	Rio de Janeiro	Rio de Janeiro				-43.2075004577637	-22.9027996063232	57442												<a href="http://n2t.net/ark:/65665/34f0430e8-d195-4064-9a16-ea46264f21a7" target="other" class="eLink"> <mi>dwc_moreinfo</mi></a>
SMITHSONIAN	US	1570181	Solanum sublentum	PreservedSpecimen	Plantae		Dicotyledonae	Solanales	Solanaceae	Solanum	sublentum		Hieron.						s.n.		E. H. Ule	1895	01				South America - Neotropics	Brazil	Rio de Janeiro	Rio de Janeiro	Corcovado			-43.2075004577637	-22.9027996063232	57442												<a href="http://n2t.net/ark:/65665/39cb07642-ccb8-4072-8ba9-7c884ae0c6bb" target="other" class="eLink"> <mi>dwc_moreinfo</mi></a>
SMITHSONIAN	US	1570182	Solanum sublentum	PreservedSpecimen	Plantae		Dicotyledonae	Solanales	Solanaceae	Solanum	sublentum		Hieron.						s.n.		E. H. Ule						South America - Neotropics	Brazil	Rio de Janeiro	Rio de Janeiro	Corcovado			-43.2075004577637	-22.9027996063232	57442												<a href="http://n2t.net/ark:/65665/3e587445d-5dc8-4484-9655-fdfc6769cba9" target="other" class="eLink"> <mi>dwc_moreinfo</mi></a>
SMITHSONIAN	US	1570293	Solanum sublentum	PreservedSpecimen	Plantae		Dicotyledonae	Solanales	Solanaceae	Solanum	sublentum		Hieron.						11018		A. C. Brade	1921	08	23			South America - Neotropics	Brazil	Rio de Janeiro	Rio de Janeiro	Vista Chinesa			-43.2075004577637	-22.9027996063232	57442												<a href="http://n2t.net/ark:/65665/3c7a02a66-0de3-4580-a036-cf48b5178dfb" target="other" class="eLink"> <mi>dwc_moreinfo</mi></a>
SMITHSONIAN	US	1616953	Solanum sublentum	PreservedSpecimen	Plantae		Dicotyledonae	Solanales	Solanaceae	Solanum	sublentum		Hieron.						s.n.		Bierrembach	1905	06				South America - Neotropics	Brazil	São Paulo	São José do Barreiro				-44.5699996948242	-22.6399993896484	30784												<a href="http://n2t.net/ark:/65665/3400a3c6e-8b98-4558-9bbf-db2980eb4040" target="other" class="eLink"> <mi>dwc_moreinfo</mi></a>
SMITHSONIAN	US	2436248	Solanum sublentum	PreservedSpecimen	Plantae		Dicotyledonae	Solanales	Solanaceae	Solanum	sublentum		Hieron.						s.n.		E. Richter	1959	07	18			South America - Neotropics	Brazil	Rio de Janeiro	Rio de Janeiro	Guanabara, Alto da Boa Vista			-43.2075004577637	-22.9027996063232	57442												<a href="http://n2t.net/ark:/65665/3cc36526d-a1ea-44cf-b855-53ba0d02883b" target="other" class="eLink"> <mi>dwc_moreinfo</mi></a>
SMITHSONIAN	US	2544241	Solanum sublentum	PreservedSpecimen	Plantae		Dicotyledonae	Solanales	Solanaceae	Solanum	sublentum		Hieron.						6455		E. P. Heringer	1958	08	29			South America - Neotropics	Brazil	Minas Gerais	Paraopeba	Lagoa Preta			-44.4042015075684	-19.2744007110596	26090												<a href="http://n2t.net/ark:/65665/35349922b-d0dc-43cd-820e-9324c9584dbc" target="other" class="eLink"> <mi>dwc_moreinfo</mi></a>
SMITHSONIAN	US	2710693	Solanum sublentum	PreservedSpecimen	Plantae		Dicotyledonae	Solanales	Solanaceae	Solanum	sublentum		Hieron.						2753		T. C. Plowman	1969	05	22			South America - Neotropics	Brazil	Rio de Janeiro	Rio de Janeiro	Monte Corcovado			-43.2075004577637	-22.9027996063232	57442		400	500									<a href="http://n2t.net/ark:/65665/3faf2fb4f-db10-4618-acd2-9a0a0474cddf" target="other" class="eLink"> <mi>dwc_moreinfo</mi></a>
SMITHSONIAN	US	273012	Solanum sublentum	PreservedSpecimen	Plantae		Dicotyledonae	Solanales	Solanaceae	Solanum	sublentum		Hieron.						342		A. F. Regnell	1905	03	05			South America - Neotropics	Brazil	Rio de Janeiro																			<a href="http://n2t.net/ark:/65665/3a3400728-cc00-4ac3-b9b4-32dd9fb442f2" target="other" class="eLink"> <mi>dwc_moreinfo</mi></a>
SMITHSONIAN	US	273013	Solanum sublentum	PreservedSpecimen	Plantae		Dicotyledonae	Solanales	Solanaceae	Solanum	sublentum		Hieron.						164		A. Regnell	1905	01	13			South America - Neotropics	Brazil	Rio de Janeiro																			<a href="http://n2t.net/ark:/65665/351424392-e95d-49a6-8726-b34f7d2edab8" target="other" class="eLink"> <mi>dwc_moreinfo</mi></a>
SMITHSONIAN	US	2830350	Solanum sublentum	PreservedSpecimen	Plantae		Dicotyledonae	Solanales	Solanaceae	Solanum	sublentum		Hieron.						2115		R. S. Pinheiro	1973	04	24			South America - Neotropics	Brazil	Bahia		km r da rod. Nova Viçosa para Posto da Restinga																	<a href="http://n2t.net/ark:/65665/3cc6d3911-9c71-4879-9acb-1e014e53ae84" target="other" class="eLink"> <mi>dwc_moreinfo</mi></a>
SMITHSONIAN	US	2852490	Solanum sublentum	PreservedSpecimen	Plantae		Dicotyledonae	Solanales	Solanaceae	Solanum	sublentum		Hieron.						10459		S. A. Mori, L. Mattos & T. S. Santos	1978	09	13			South America - Neotropics	Brazil	Bahia	Mucuri	4 km a W deucuri. Folha SE-24 (18-40d)			-39.5508003234863	-18.0863990783691	78440												<a href="http://n2t.net/ark:/65665/3c9b78739-fe9c-4a35-ba3a-daddda674487" target="other" class="eLink"> <mi>dwc_moreinfo</mi></a>
SMITHSONIAN	US	2909451	Solanum sublentum	PreservedSpecimen	Plantae		Dicotyledonae	Solanales	Solanaceae	Solanum	sublentum		Hieron.						3373		M. Nee	1970	10	10			South America - Neotropics	Brazil	Rio de Janeiro	Rio de Janeiro	Above Rua Aprazível and Rua Fr. de Andrade	-43.5	-23					200	200									<a href="http://n2t.net/ark:/65665/35e1335b7-e1bc-4455-8526-ca048873cc67" target="other" class="eLink"> <mi>dwc_moreinfo</mi></a>
NYBG	NYBG_BR	00700657	Solanum sublentum	PreservedSpecimen	Plantae	Magnoliophyta		Solanales	Solanaceae	Solanum	sublentum		Hiern	M. H. Nee	1982				34747		G. G. Hatschbach	1974	07	24			South America	Brazil	Goiás	Jataí	Rod. BR-364	-51.7142	-17.8817										sheet					<a href="http://sweetgum.nybg.org/science/vh/specimen_details.php?irn=836898" target="other" class="eLink"> <mi>dwc_moreinfo</mi></a>
NYBG	NYBG_BR	172191	Solanum sublentum	PreservedSpecimen	Plantae	Magnoliophyta		Solanales	Solanaceae	Solanum	sublentum		Hiern					isotype	s.n.		J. E. B. Warming	1864	01	21			South America	Brazil			Lagoa Santa												sheet					<a href="http://sweetgum.nybg.org/science/vh/specimen_details.php?irn=135566" target="other" class="eLink"> <mi>dwc_moreinfo</mi></a>
NYBG	NYBG_BR	770751	Solanum sublentum	PreservedSpecimen	Plantae	Magnoliophyta		Solanales	Solanaceae	Solanum	sublentum		Hiern	M. de F. Agra	1999	09			5002		A. P. Duarte	1959	09	02			South America	Brazil	Rio de Janeiro		Estado da Guanabara, Pedra da Onça, Estrada do Redentor.												sheet					<a href="http://sweetgum.nybg.org/science/vh/specimen_details.php?irn=135560" target="other" class="eLink"> <mi>dwc_moreinfo</mi></a>
NYBG	NYBG_BR	770752	Solanum sublentum	PreservedSpecimen	Plantae	Magnoliophyta		Solanales	Solanaceae	Solanum	sublentum		Hiern						62957		G. G. Hatschbach	1995	08	11			South America	Brazil	Espírito Santo		Rod. BR-101, 1km S de Pedro Canário.												sheet					<a href="http://sweetgum.nybg.org/science/vh/specimen_details.php?irn=135565" target="other" class="eLink"> <mi>dwc_moreinfo</mi></a>
NYBG	NYBG_BR	770753	Solanum sublentum	PreservedSpecimen	Plantae	Magnoliophyta		Solanales	Solanaceae	Solanum	sublentum		Hiern	M. de F. Agra	1999	09			253		Martii Herbar. Florae Brasil.	1841					South America	Brazil	Rio de Janeiro														sheet					<a href="http://sweetgum.nybg.org/science/vh/specimen_details.php?irn=135561" target="other" class="eLink"> <mi>dwc_moreinfo</mi></a>
NYBG	NYBG_BR	770754	Solanum sublentum	PreservedSpecimen	Plantae	Magnoliophyta		Solanales	Solanaceae	Solanum	sublentum		Hiern	M. de F. Agra	1999	09			32		L. Riedel						South America	Brazil	Rio de Janeiro														sheet					<a href="http://sweetgum.nybg.org/science/vh/specimen_details.php?irn=135563" target="other" class="eLink"> <mi>dwc_moreinfo</mi></a>
NYBG	NYBG_BR	770755	Solanum sublentum	PreservedSpecimen	Plantae	Magnoliophyta		Solanales	Solanaceae	Solanum	sublentum		Hiern	M. de F. Agra	1999	09			32		L. Riedel						South America	Brazil	Rio de Janeiro														sheet					<a href="http://sweetgum.nybg.org/science/vh/specimen_details.php?irn=135564" target="other" class="eLink"> <mi>dwc_moreinfo</mi></a>
NYBG	NYBG_BR	770756	Solanum sublentum	PreservedSpecimen	Plantae	Magnoliophyta		Solanales	Solanaceae	Solanum	sublentum		Hiern	M. de F. Agra	1999	09			32		L. Riedel						South America	Brazil	Rio de Janeiro														sheet					<a href="http://sweetgum.nybg.org/science/vh/specimen_details.php?irn=135559" target="other" class="eLink"> <mi>dwc_moreinfo</mi></a>
NYBG	NYBG_BR	770759	Solanum sublentum	PreservedSpecimen	Plantae	Magnoliophyta		Solanales	Solanaceae	Solanum	sublentum		Hiern						379		L. Riedel	1826	06				South America	Brazil	São Paulo	Pederneiras	Pr. Pederneira P. St. Paul.	-48.77	-22.3503										sheet					<a href="http://sweetgum.nybg.org/science/vh/specimen_details.php?irn=135562" target="other" class="eLink"> <mi>dwc_moreinfo</mi></a>
NYBG	NYBG_BR		Solanum sublentum	PreservedSpecimen	Plantae	Magnoliophyta		Solanales	Solanaceae	Solanum	sublentum		Hiern	M. de F. Agra	1999	09			379		L. Riedel	1826	06				South America	Brazil	São Paulo	Pederneiras	Pr. Pederneira P. St. Paul.	-48.77	-22.3503										sheet
NYBG	NYBG_BR		Solanum sublentum	PreservedSpecimen	Plantae	Magnoliophyta		Solanales	Solanaceae	Solanum	sublentum		Hiern	M. de F. Agra	1999	09			32		L. Riedel						South America	Brazil	Rio de Janeiro														sheet
UFMG	BHCB	129450	Solanum sublentum	PreservedSpecimen	Plantae	Dicotyledon			Solanaceae	Solanum	sublentum		Hiern		2018	03	05		2922		Demuner, V; Magnago, LFS; Cruz, T; Bausen, E	2006	10	17			Southern America	Brasil	Espírito Santo	Águia Branca	16 de Abril	-40.734722	-18.906944					150	200									Arbusto 4m, flores roxas, anteras amarelas.; Interior de mata alterad
UFMG	BHCB	178478	Solanum sublentum	PreservedSpecimen	Plantae	Dicotyledon			Solanaceae	Solanum	sublentum		Hiern		2015	02	12		6370		Stehmann, JR; Gouvêa, YF; Moreira, NC	2015	02	12			Southern America	Brasil	Minas Gerais	Lagoa Santa	Morro do Bau.	-43.9925	-19.548333					745	745									Arbusto ca. 1m de altura; ramos e folhas viscidos; cálice frutifero persistente, ampliado englobando o fruto.; Afloramento calcáreo.
UFMG	BHCB	178480	Solanum sublentum	PreservedSpecimen	Plantae	Dicotyledon			Solanaceae	Solanum	sublentum		Hiern		2015	02	12		6372		Stehmann, JR; Gouvêa, YF; Moreira, NC	2015	02	12			Southern America	Brasil	Minas Gerais	Lagoa Santa	Morro do Bau.	-43.988889	-19.548056					712	712									Arbusto ca. 2m de altura, viscoso; flores arroxeadas, anteras amarelas.; Afloramento rochoso calcareo.
UFMG	BHCB	191367	Solanum sublentum	PreservedSpecimen	Plantae	Dicotyledon			Solanaceae	Solanum	sublentum		Hiern						499		Giacomin, LL; Oliveira, CT	2008	12	22			Southern America	Brasil	Minas Gerais	Bom Jesus do Galho	Zona rura, Ca. de 7 km a leste de Revés do Belem. Fragmento de floresta ombrófila degradada, próximo a pasto.	-42.405722	-19.61175					274	274									Arbusto prostrado, flores roxas.
UFMG	BHCB	192566	Solanum sublentum	PreservedSpecimen	Plantae	Dicotyledon			Solanaceae	Solanum	sublentum		Hiern		2018	09			49		Ferreira, VL; Stehmann, JR	2018	09	18			Southern America	Brasil	Minas Gerais	Pedro Leopoldo	Lapa do Baú	-43.992222	-19.548611					720	720									Arbusto com cerca de 1m. Flores rochas e estames amarelos.; Afloramento de calcáreo, em fenda no maciço.
UFMG	BHCB	199824	Solanum sublentum	PreservedSpecimen	Plantae	Dicotyledon			Solanaceae	Solanum	sublentum		Hiern		2008				3907		Sucre, D	1968	10	11			Southern America	Brasil	Rio de Janeiro	Cabo Frio	Jardim Botânico do Rio de Janeiro, Restinga de Cabo Frio			-42.0186004638672	-22.8794002532959	40069												Arbusto com mais ou menos 2,50 metros de altura, pétalas roxas, antears amarelas.; Restinga
UFMG	BHCB	199842	Solanum sublentum	PreservedSpecimen	Plantae	Dicotyledon			Solanaceae	Solanum	sublentum		Hiern		2006				9668		Sucre, D; Silva, JF	1972	10	04			Southern America	Brasil	Rio de Janeiro	Morro do Leme	Quartel Duque de Caxias							120	120									Arbusto rupícula, semi-umbrófilo com 1,80 m de alt.; rachis da inflorescência; cálice e pecíolos atropurpéreos, corola roxa, Exposição sul.
UFMG	BHCB	76108	Solanum sublentum	PreservedSpecimen	Plantae	Dicotyledon			Solanaceae	Solanum	sublentum		Hiern						333		Pifano, DS						Southern America	Brasil	Minas Gerais	Caratinga	Lagoa Silvana			-42.1391983032227	-19.7896995544434	49886												Arbusto ca. 1,5m na borda da mata próxima à lagoa. Flores roxas com anteras amareladas. Presente em local de meia luz.
UFMG	BHCB	7841	Solanum sublentum	PreservedSpecimen	Plantae	Dicotyledon			Solanaceae	Solanum	sublentum		Hiern		2001	04			185		Andrade, PM de; Lopes, MA	1984	02	22			Southern America	Brasil	Minas Gerais	Caratinga	Estação Biológica de Caratinga., Fazenda Montes Claros			-42.1391983032227	-19.7896995544434	49886												arv.4030;MA-320;; Arbóreo, Folhas com glândulas, melosa; Mata Atlântica
UFBA	ALCB	108790	Solanum sublentum	PreservedSpecimen	Plantae	Dicotyledon			Solanaceae	Solanum	sublentum		Hiern	Gouvêa, YF	2017	09			19611		Guedes, ML	2012	04	07			Southern America	Brasil	Rio de Janeiro	Rio de Janeiro	APA Restinga entre Itaipuaçu e Marica	-42.902222	-22.974722															espinescente. Caule com acúleo. Folhas membranáceas, pilosas. Flores lilás.
UFOPA	HSTM	5899	Solanum sublentum	S	Plantae				Solanaceae	Solanum	sublentum		Hiern	Stehmann, J.R.	2015	02	12		6370		Stehmann, J.R.; Gouvea, Y.F.; Moreira, N.C.	2015	02	12				Brasil	Minas Gerais	Lagoa Santa	Morro do Bau.	-43.9925	-19.548333					745	745
UFOPA	HSTM	8386	Solanum sublentum	S	Plantae				Solanaceae	Solanum	sublentum		Hiern	Stehmann, J.R.	2015	02	12		6372		Stehmann, J.R.; Gouvea, Y.F.; Moreira, N.C.	2015	02	12				Brasil	Minas Gerais	Lagoa Santa	Morro do Bau.	-43.889722	-19.629167					712	712
MBM	MBM	227968	Solanum sublentum	S	Plantae				Solanaceae	Solanum	sublentum		Hiern	Stehmann, J.R.					3259		Salino, A.						Southern America	Brazil	Minas Gerais	Januária	Distrito de Fabião			-44.3616981506348	-15.4881000518799	148972
MBM	MBM	32958	Solanum sublentum	S	Plantae				Solanaceae	Solanum	sublentum		Hiern	Nee, M.					34747		Hatschbach, G.						Southern America	Brazil	Goiás	Jataí	Rod. BR-364			-51.7144012451172	-17.8813991546631	75073
UFES	VIES	10579	Solanum sublentum	S	Plantae				Solanaceae	Solanum	sublentum		Hiern	Assis, A.M.	2010	08	07		2580		Assis, A.M.; Vago, A.; Cribari, R.S. & Santos, R.	2010	08	07				Brasil	Espírito Santo	Serra	Mestre Álvaro.			-40.3078002929688	-20.1285991668701	16451		240	240
UFES	VIES	27450	Solanum sublentum	S	Plantae				Solanaceae	Solanum	sublentum		Hiern	Stehmann, J.R.	2016	09	28		181		Silva, L.A.; Barros, P.H.D.; Iglesias, D.T. & Firmino, A.D.	2012	05	30				Brasil	Espírito Santo	Vila Velha	Parque Natural Municipal de Jacarenema.			-40.2924995422363	-20.3297004699707	27156
IAC	IAC	25781	Solanum sublentum	S	Plantae				Solanaceae	Solanum	sublentum		Hiern	J.R. Stehmann & L.L. Giacomin	2011	09	22		s/nº		J. Vasconcellos Neto	1977	03	22				Brasil	São Paulo	Sumaré	Horto Florestal	-47.2669	-22.8219															Não localizado no acervo!
USP	SPF	134016	Solanum sublentum	PreservedSpecimen	Plantae				Solanaceae	Solanum	sublentum		Hiern	Agra, MF	1998	08			1814		Lombardi, JA	1997	05	25				Brasil	Minas Gerais	Januária		-44.254722	-15.140278
USP	SPF	134017	Solanum sublentum	PreservedSpecimen	Plantae				Solanaceae	Solanum	sublentum		Hiern	Stehmann, JR	1997	11			3259		Salino, A	1997	07	20				Brasil	Minas Gerais	Januária	Vale do Peruaçu	-44.242778	-15.123056
UFPB	JPB	55216	Solanum sublentum	PreservedSpecimen	Plantae	Angiosperma		Dicotyledon	Solanaceae	Solanum	sublentum		Hiern.	Agra, MF	2006	09	28		1092		Marquete, R; Gomes, JC	1993	06	29			Southern America	Brasil	Rio de Janeiro	Paraty	Passando a primeira ponte entrar a direita (sentido RJ/SP) a ca. 13 km do trevo.			-44.7131004333496	-23.2178001403809	34470												; DESC: Árvore com ca. 8 m de alt.; exsudato incolor; tronco com casca lisa e ramos de cor amarronzado; folhas cariáceas. Heliófila; ripária em ambiente úmido.
UFPB	JPB	55225	Solanum sublentum	PreservedSpecimen	Plantae	Angiosperma		Dicotyledon	Solanaceae	Solanum	sublentum		Hiern.	Agra, MF	2006	09	27		9668		Sucre, D; Silva, JF	1972	10	04			Southern America	Brasil	Rio de Janeiro	Morro do Leme	Quartel Duque de Caxias							120	120									; DESC: Arbusto rupícula, semiumbrófilo com 1, 80 m alt.; rachis da inflorescência, cálice e pecíolos atropurpureos, corola roxa. Exposição Sul.
MBML	MBML-HERBARIO	13994	Solanum sublentum		Plantae				Solanaceae	Solanum	sublentum			L.D.'A.F.Carv/J.Steh./M.F.Agra					3459		L. Kollmann; et al	2000	12	11				Brasil	Espírito Santo	Barra de São Francisco	Parque Municipal Sombra da Tarde	-40.890833	-18.755															Arbusto 1m no sol. Flores lilás.
MBML	MBML-HERBARIO	27899	Solanum sublentum		Plantae				Solanaceae	Solanum	sublentum			J. R. Stehmann26-07-2006	2006	07	26		579		L. F. S. Magnago; V. Demuner, M. Belizário, E. Bausen	2006	02	01				Brasil	Espírito Santo	Águia Branca	Aguas Claras, Escola Agroecológica.	-40.825833	-18.890278					300	300									Arbusto 1,5m de alt. Flores roxas. Borda da mata.
MBML	MBML-HERBARIO	4188	Solanum sublentum		Plantae				Solanaceae	Solanum	sublentum			J. R. Stehmann/2006					119		W. Pizziolo	1984	05	30				Brasil	Espírito Santo	Santa Teresa	Goiapaba-Açu	-40.479444	-19.919722															Arbusto de +/- 2m, flor roxa, altitude de +/- 500m.
IBt	SP	15381	Solanum sublentum	S	Plantae				Solanaceae	Solanum	sublentum		Hiern	Morton, CV					ERF7		Bierrembach	1905	06					Brasil	São Paulo	São José do Barreiro	Barreiro, capoeira e m.v.			-44.5699996948242	-22.6399993896484	30784												Arbusto viscoso, cal. inflato.
UEL	FUEL	25766	Solanum sublentum	PreservedSpecimen	Plantae	Tracheophyta		Solanales	Solanaceae	Solanum	sublentum		Hiern.	Stehmann, JR	1997				s.n.		Salino, A	1993	03	16				Brasil	Minas Gerais	Januária	Vale do rio Peruaçu			-44.3616981506348	-15.4881000518799	148972												Flores lilás, estames amarelos, cálice verde e inflado; planta andromonóica e pegajosa; a caminho do Jamelão.
USP	SPFW	2337	Solanum sublentum	PreservedSpecimen	Plantae				Solanaceae	Solanum	sublentum		Hiern.	J.R. Stehmann					2812		Ceccantini, G.C.T. Freire, G.Q.; Garcia, R.; Jono, V.; Melo Jr, J.C.F.	2006						Brasil	Minas Gerais	Matozinhos		-44.015167	-19.477194					702	702
UEFS	HUEFS	75223	Solanum sublentum	PreservedSpecimen	Plantae	Angiospermae	Asteranae	Solanales	Solanaceae	Solanum	sublentum		Hiern	L.L.Giacomin	2013	09			2355		Lombardi, J.A.	1998	09	05				Brasil	Minas Gerais	Caratinga	Estação Biológica da Caratinga, Matão	-41.817222	-19.731389
MNHN	MNHN_P_PC_BR	P00614735	Solanum sublentum	S	Plantae				Solanaceae	Solanum	sublentum		Hieron.	Agra	2008				A1 393		Saint-Hilaire, A. de	1816	1	1				Brasil															hb				P00614735
MNHN	MNHN_P_PC_BR	P00614735	Solanum sublentum	S	Plantae				Solanaceae	Solanum	sublentum		Hieron.						A1 393		Saint-Hilaire, A. de	1816	1	1				Brasil															hb				P00614735	operation de numerisation 2010-2012
MNHN	MNHN_P_PC_BR	P00614736	Solanum sublentum	S	Plantae				Solanaceae	Solanum	sublentum		Hieron.						A1 393		Saint-Hilaire, A. de	1816	1	1				Brasil															hb				P00614736	operation de numerisation 2010-2012
MNHN	MNHN_P_PC_BR	P00614736	Solanum sublentum	S	Plantae				Solanaceae	Solanum	sublentum		Hieron.	Agra	2008				A1 393		Saint-Hilaire, A. de	1816	1	1				Brasil															hb				P00614736
MNHN	RECOLNAT_GLAZIOU	P00571123	Solanum sublentum	S	Plantae				Solanaceae	Solanum	sublentum		Hieron.						15301		Glaziou, A.	1884	2	18				Brasil															hb				P00571123	Solanum but not S. sublentum. M. Nee, June 14, 1979 (WIS).
UNICAMP	UEC	182258	Solanum sublentum	S	Plantae	Magnoliopsida			Solanaceae	Solanum	sublentum		Hieron.	Stehmann, JR	1996	10	10		6625		Vasconcellos-Neto, J	1977	06	14				Brazil	São Paulo	Sumaré	Horto florestal de Sumaré.			-47.2599983215332	-22.8199996948242	11359												Arbusto até 2m. Flores roxas com nervuras brancas.
UNICAMP	UEC	182259	Solanum sublentum	S	Plantae	Magnoliopsida			Solanaceae	Solanum	sublentum		Hieron.						5002		Duarte, AP	1959	09	02				Brazil	Rio de Janeiro	Rio de Janeiro	Estrada do Redentor.			-43.2075004577637	-22.9027996063232	57442												Planta pouco lenhificada, com ramos divaricados.
UNICAMP	UEC	29054	Solanum sublentum	S	Plantae	Magnoliopsida			Solanaceae	Solanum	sublentum		Hieron.						2944		Heringer, EP; Figueiras, TS; Mendonça, RC; Pereira, BAS; Salles, AEH; Chagas e Silva, F	1979	12	13				Brazil	Distrito Federal	Brasília	Bacia do Rio São Bartolomeu.			-47.9296989440918	-15.7797002792358	70570												Subarbusto com mais ou menos 1,20m de altura; flores alvas com estames amarelos; folhas partidas, pilosas, espinhosas.; Mata perturbada.
UNICAMP	UEC	40567	Solanum sublentum	S	Plantae	Magnoliopsida			Solanaceae	Solanum	sublentum		Hieron.	Stehmann, JR	1996	10	10		25426		Webster, GL	1984	10	17				Brazil	São Paulo	Campinas	Fazenda Santa Eliza, semi-deciduous forest.	-47.066667	-22.866667					650	650									Shrub 2m high, foliage viscid; corolla lavender-blue, anthers yellow.
UNICAMP	UEC	63231	Solanum sublentum	S	Plantae	Magnoliopsida			Solanaceae	Solanum	sublentum		Hieron.	Stehmann, JR	1994	08			89		Costa, LV; Andrade, IR	1987	07	05				Brazil	Minas Gerais	Caratinga	Estação biológica de Caratinga.			-42.1391983032227	-19.7896995544434	49886												Corola branca, antera amarela alva como invasora.
UNICAMP	UEC	63232	Solanum sublentum	S	Plantae	Magnoliopsida			Solanaceae	Solanum	sublentum		Hieron.	Stehmann, JR	1994	08			417		Lopes, MA; Andrade, PM	1984	06	18				Brazil	Minas Gerais	Caratinga	Estação biológica da Caratinga. Mata do Rafael.			-42.1391983032227	-19.7896995544434	49886												Flores liláses.; Mata Atlântica.
UNICAMP	UEC	63234	Solanum sublentum	S	Plantae	Magnoliopsida			Solanaceae	Solanum	sublentum		Hieron.	Stehmann, JR	1996	10	10		200		Costa, LV	1987	11	27				Brazil	Minas Gerais	Caratinga	Estação biológica do Caratinga, EBC, MG.			-42.1391983032227	-19.7896995544434	49886												Pétalas brancas. Arbusto de 1m.
UNICAMP	UEC	63235	Solanum sublentum	S	Plantae	Magnoliopsida			Solanaceae	Solanum	sublentum		Hieron.	Stehmann, JR	1994	08			s.n.		Stehmann, JR; Mendonça Filho, CV	1991	01	10				Brazil	Minas Gerais	Caratinga	Fazenda montes claros; Divisa do Sapo com Matão.			-42.1391983032227	-19.7896995544434	49886												Flor com pétalas brancas. Cálice inflado basalmente entre os lados; arbustivo.; Borda da mata.
